# Supplementary material for: Νovel Polylactic Acid/Tetraethyl Citrate Self-Healable Active Packaging Films Applied to Pork Fillets’ Shelf-Life Extension
Source: MDPI journal article supplement (doi:10.3390/polym16081130), 2024-04-17
Supplement: s1 [file s1]

## Supplementary Material

**Figure S1:** Equations for the determination of EC<sub>50</sub> in PLA films.

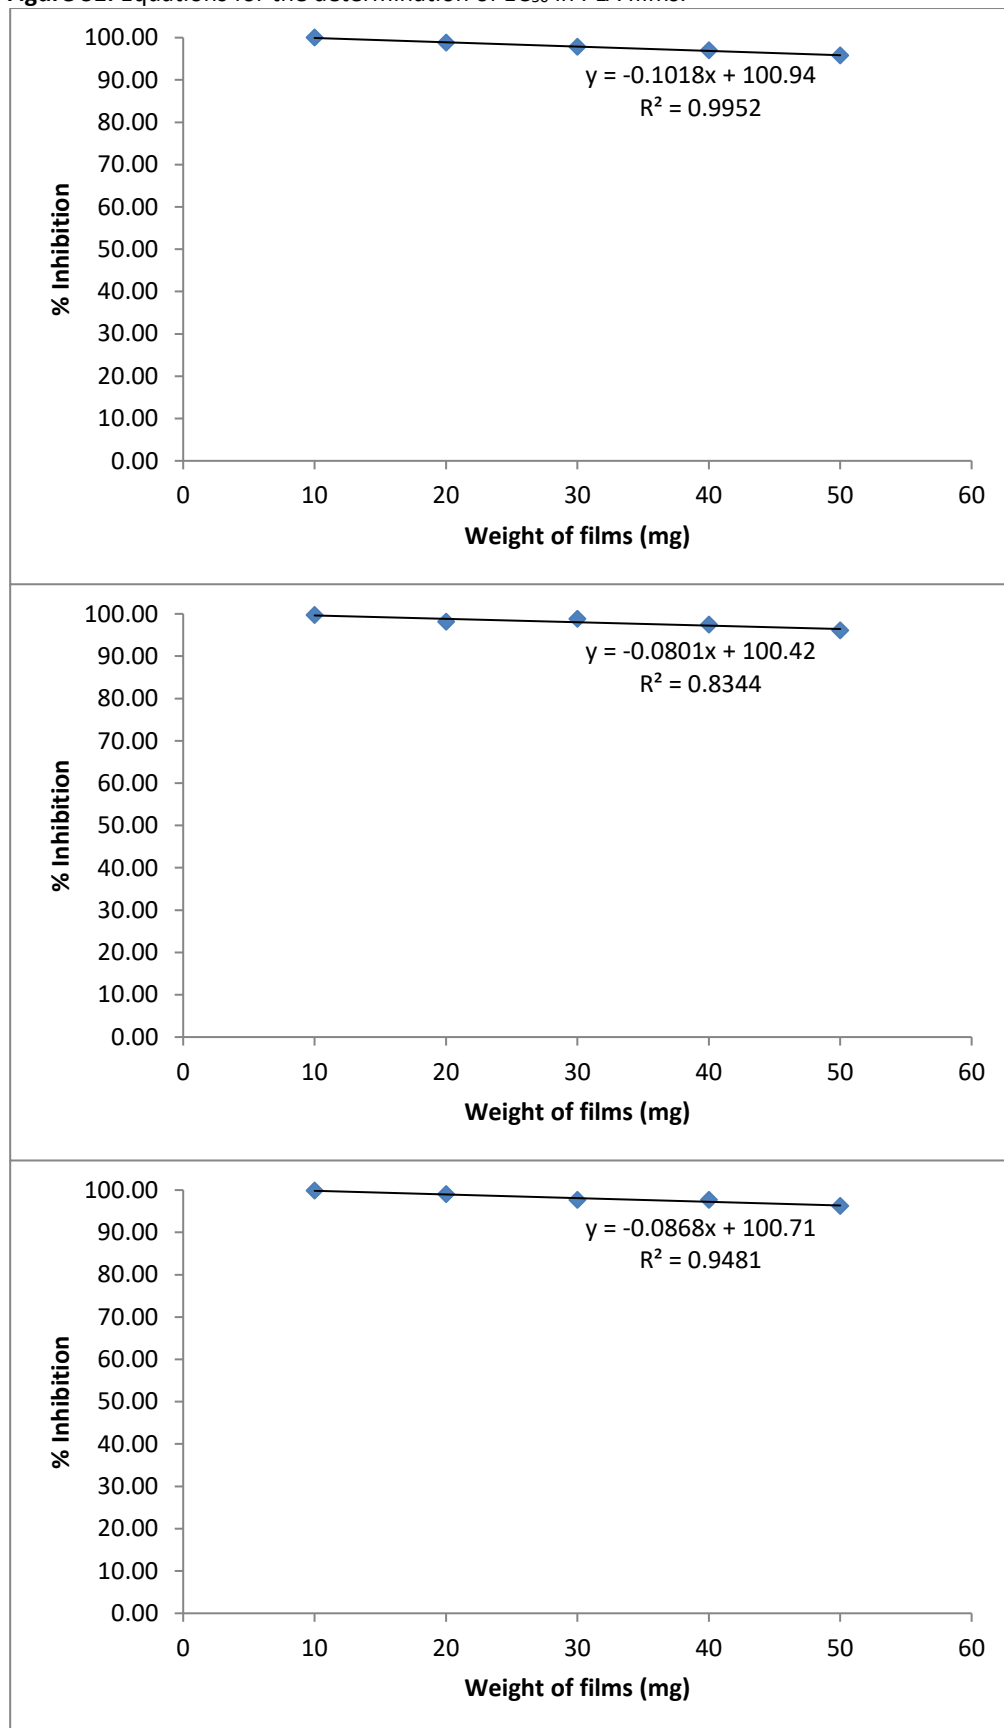

Figure S2: Equations for the determination of EC<sub>50</sub> in PLA/TEC0.2 films.

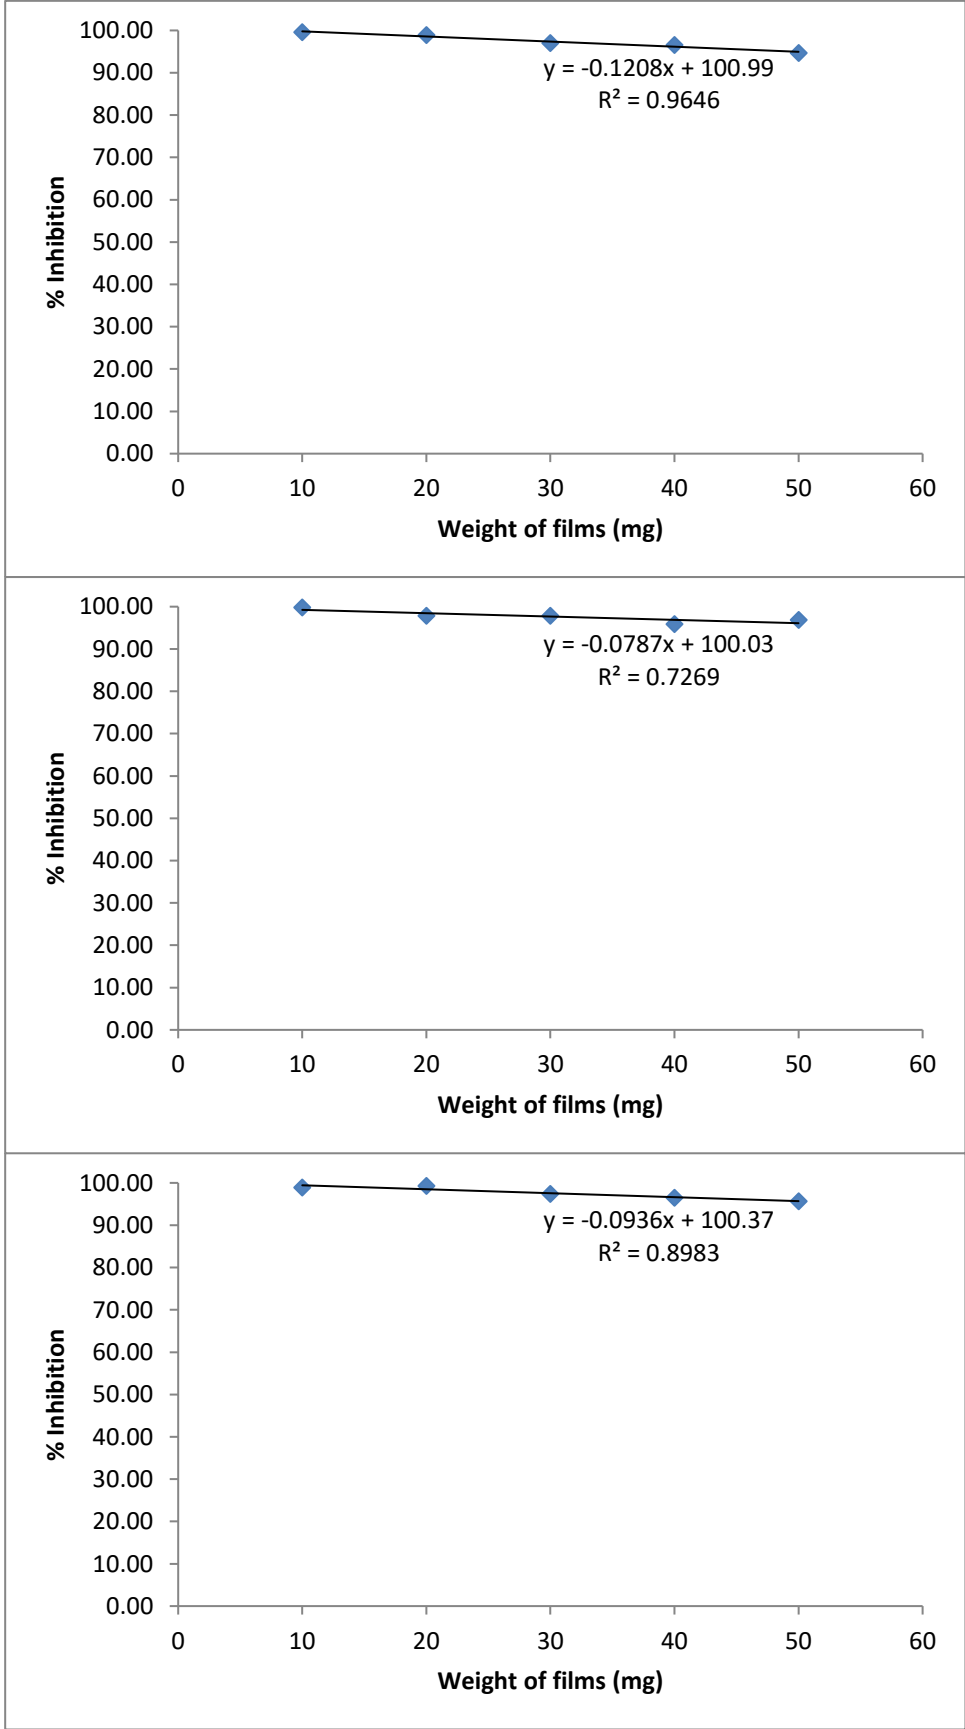

Figure S3: Equations for the determination of EC<sub>50</sub> in PLA/TECO.4 films.

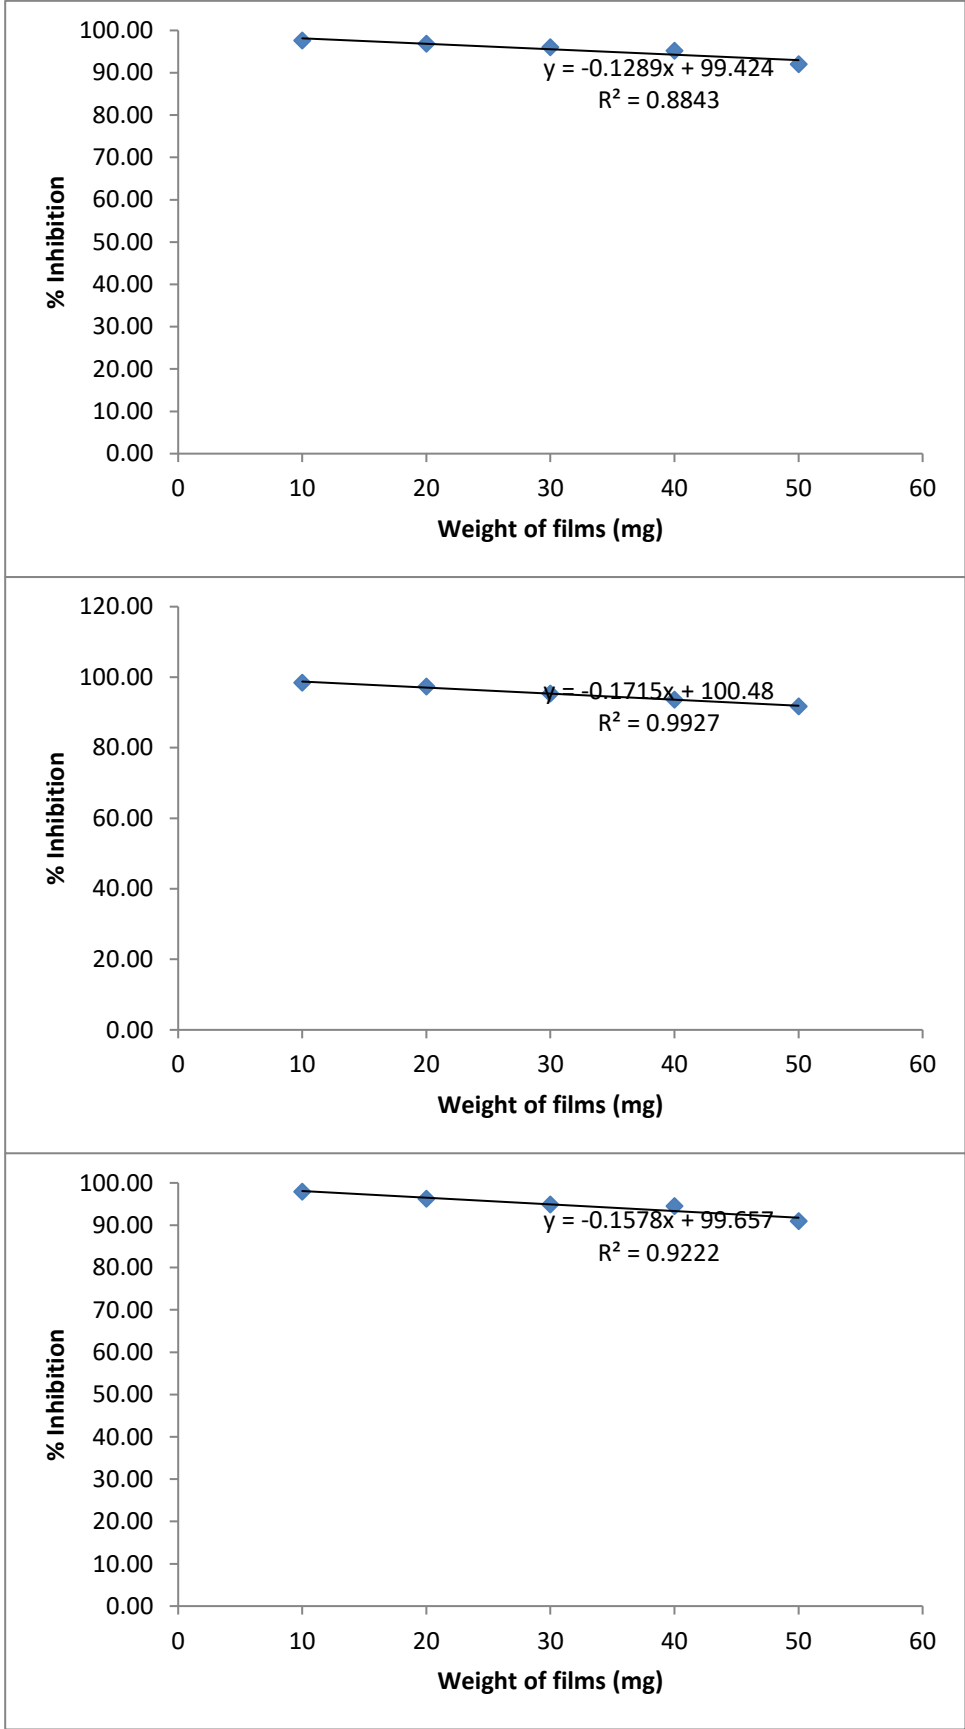

Figure S4: Equations for the determination of EC<sub>50</sub> in PLA/TECO.6 films.

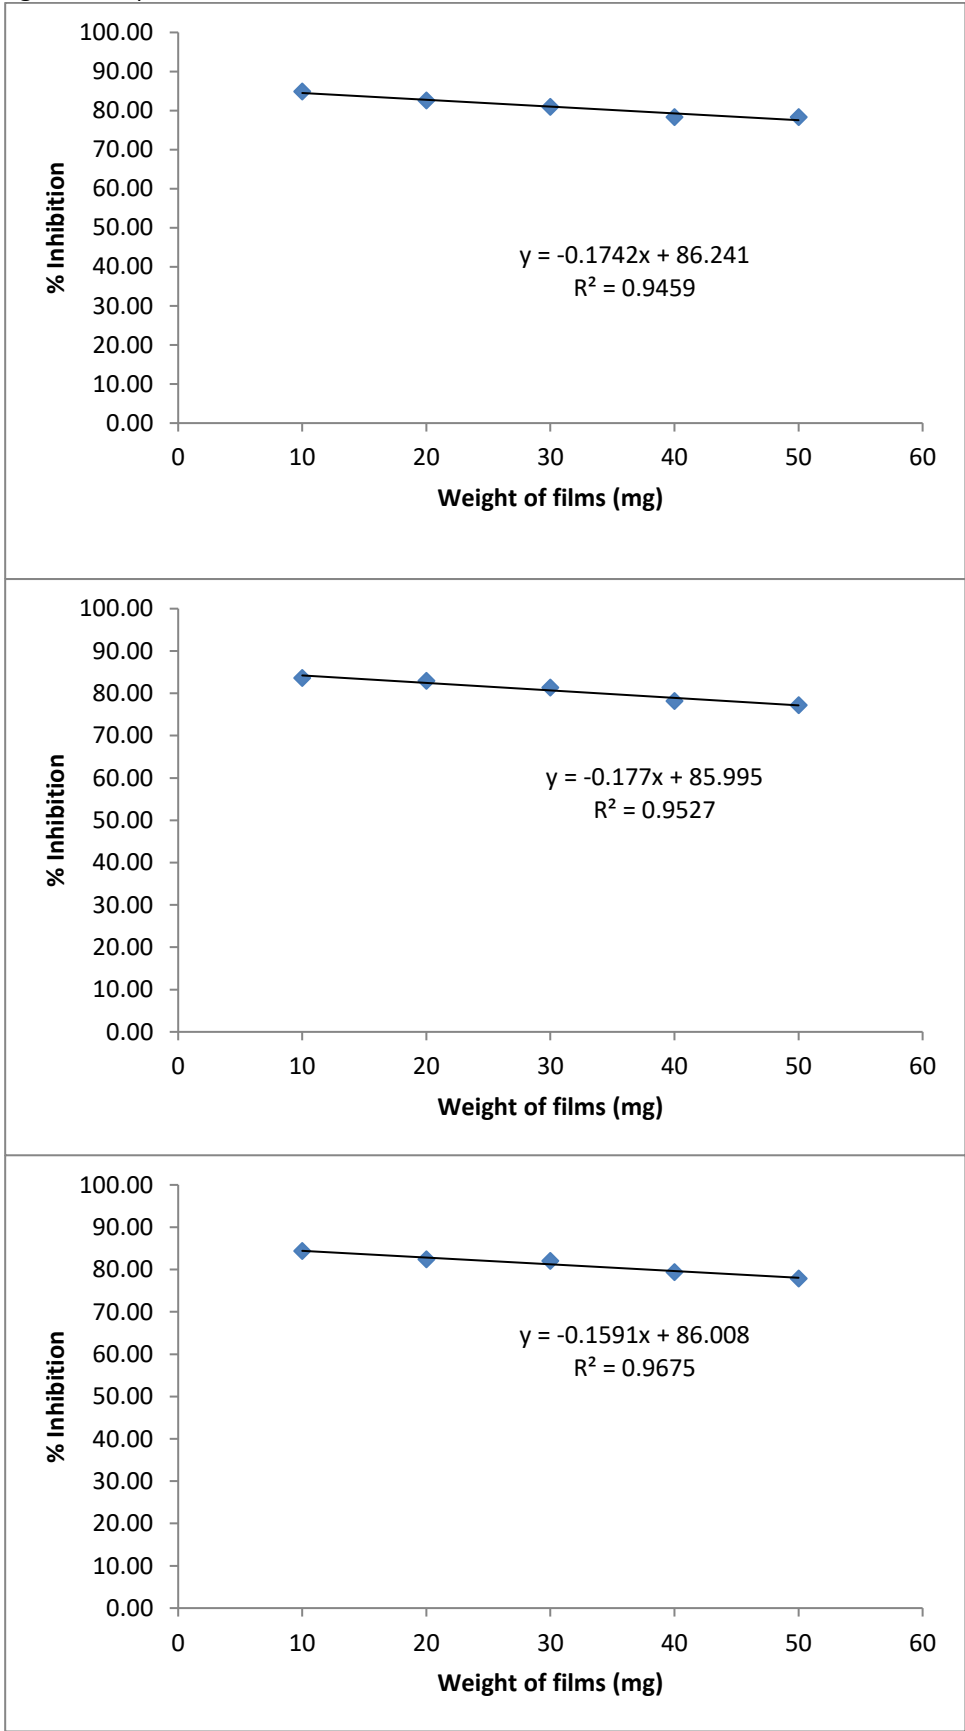

Figure S5: Equations for the determination of EC<sub>50</sub> in PLA/TEC0.8 films.

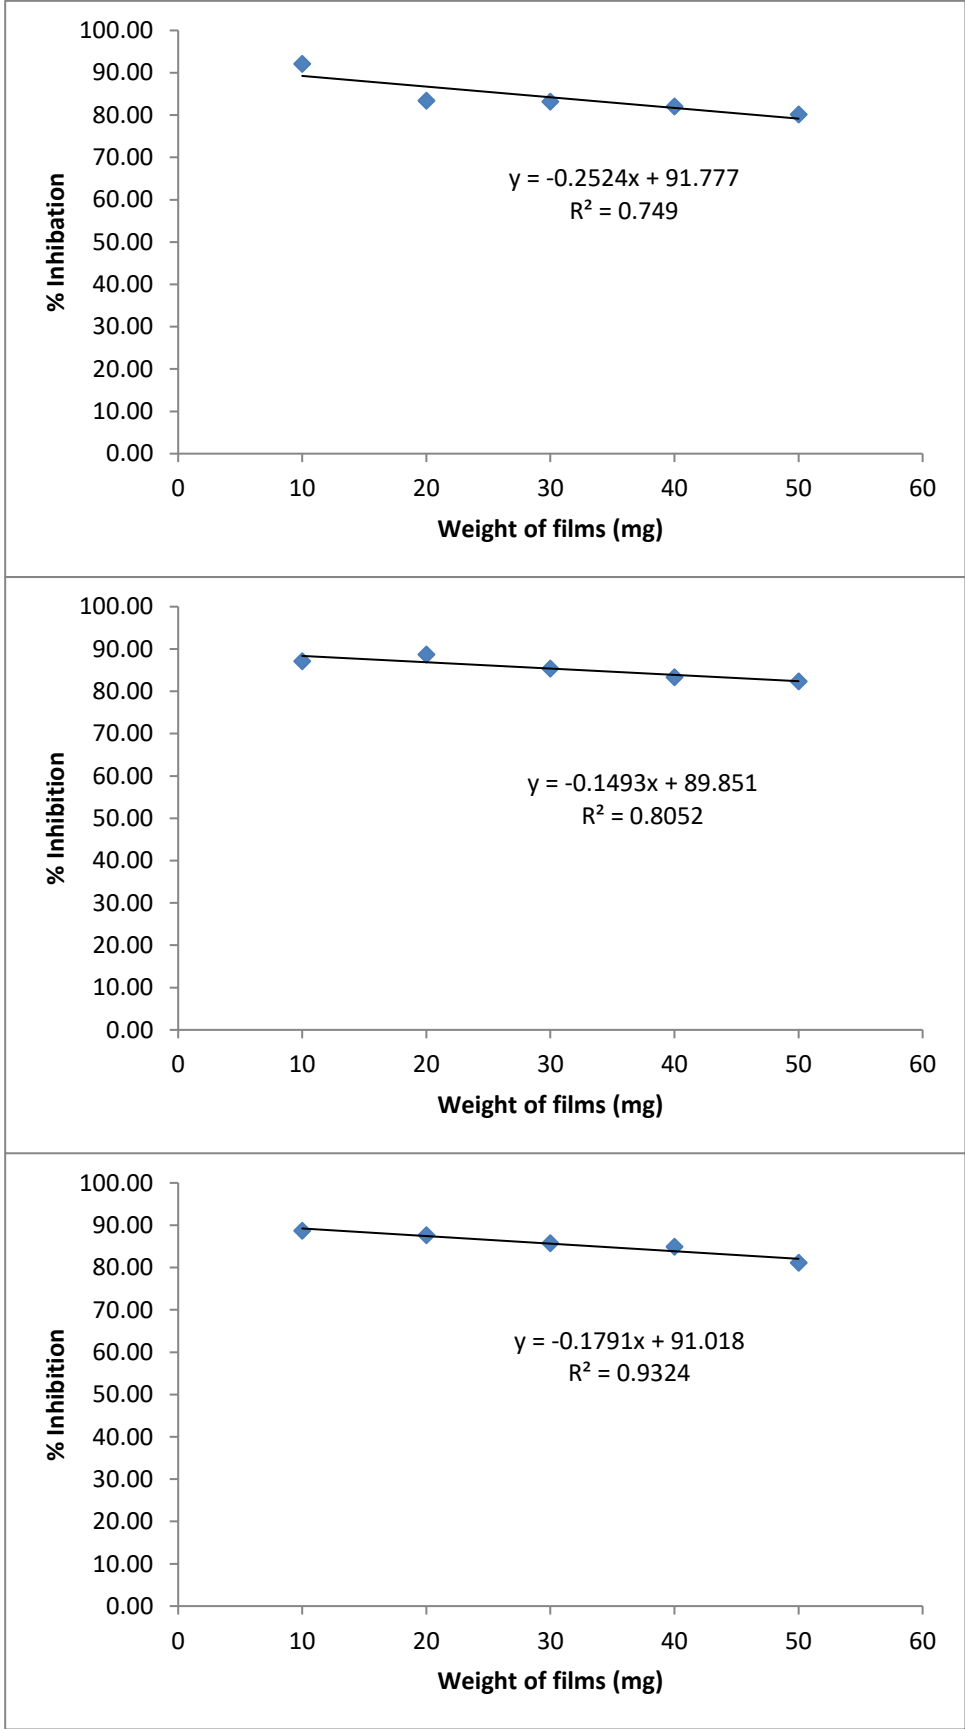

Figure S6: Equations for the determination of EC<sub>50</sub> in PLA/TEC1.0 films.

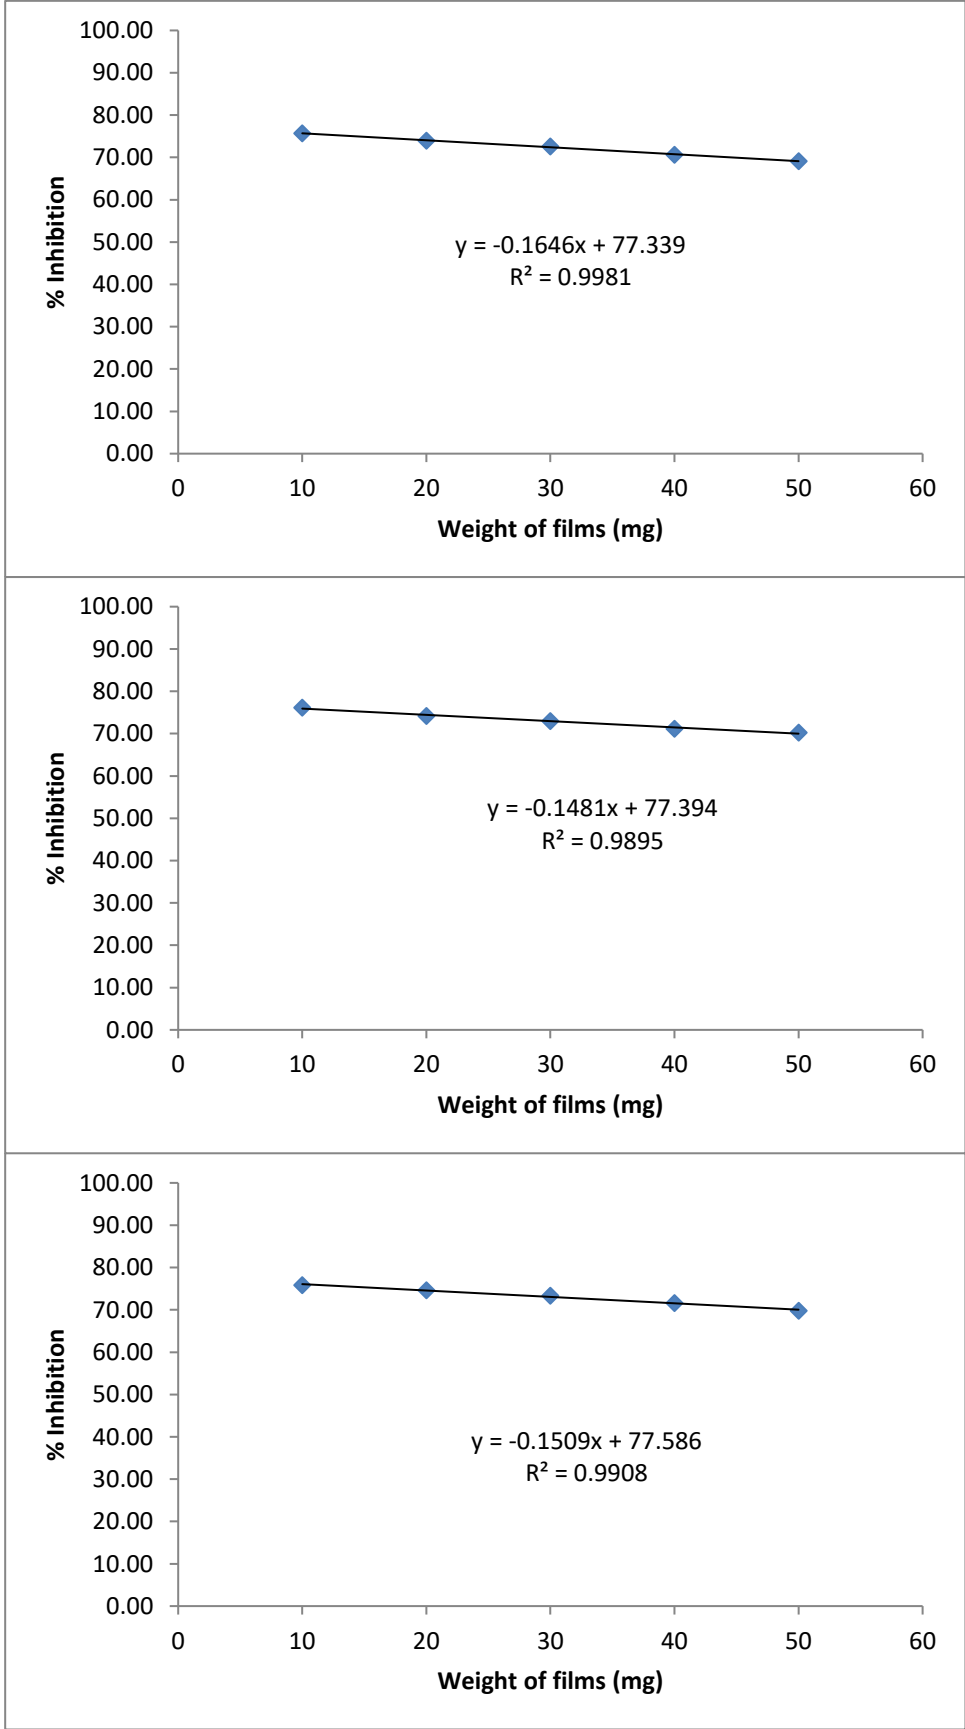

Figure S7: Equations for the determination of EC<sub>50</sub> in PLA/TEC1.2 films.

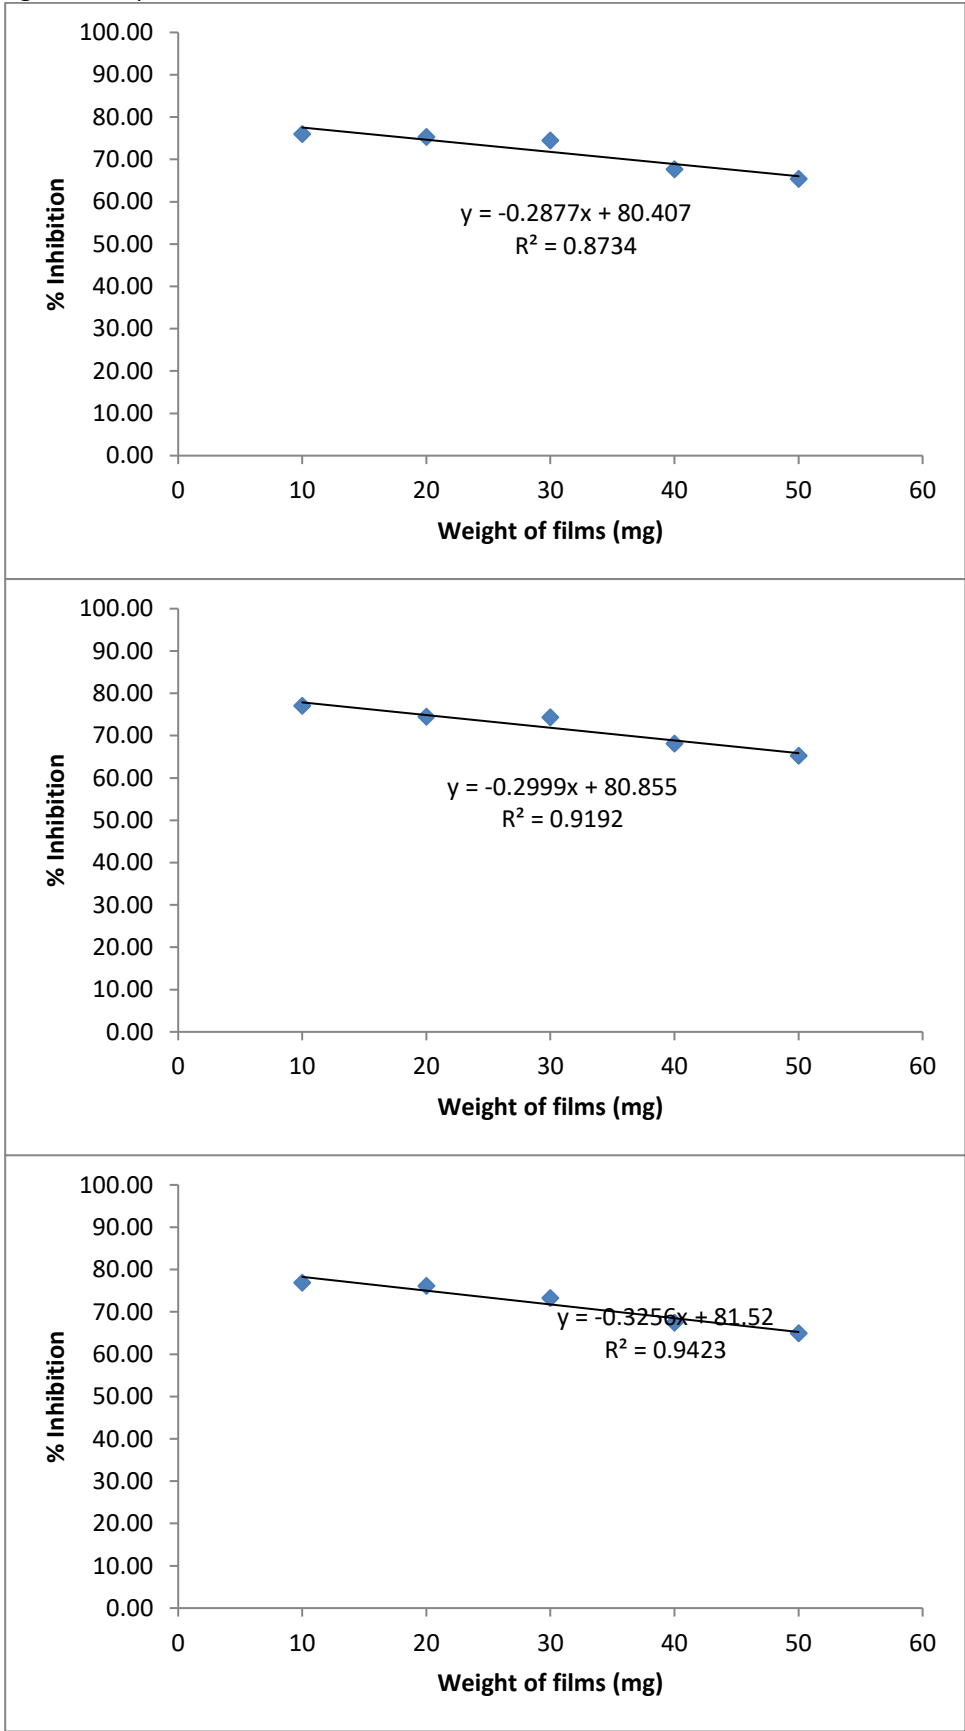

**Figure S8.** SEM surface images of (a) PLA, (b) PLA/TEC<sub>0.2</sub>, (c) PLA/TEC<sub>0.4</sub>, (d) PLA/TEC<sub>0.6</sub>, (e) PLA/TEC<sub>0.8</sub>, (f) PLA/TEC<sub>1.0</sub>, (g) PLA/TEC<sub>1.2</sub> films.

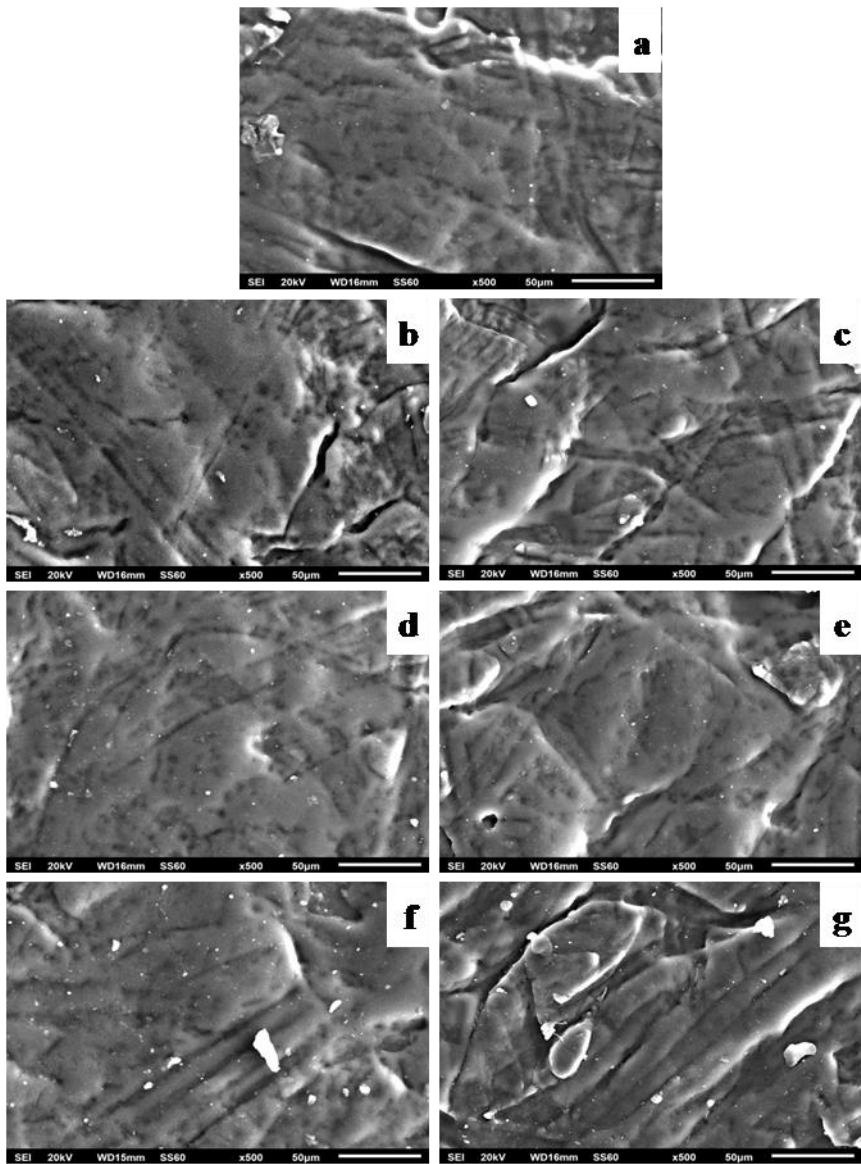

**Figure S9.** Graphical presentation of Table 2 statistical values.

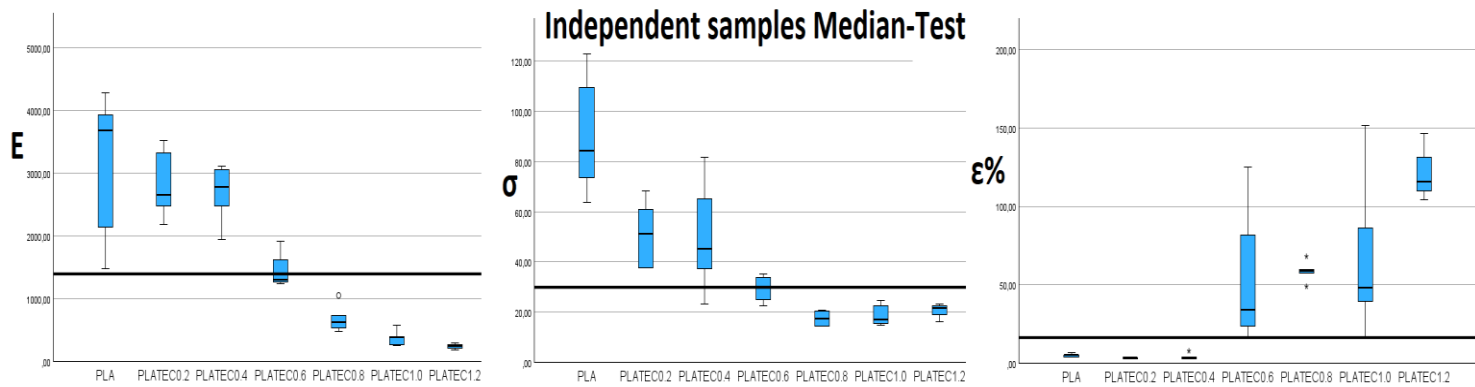



Figure S10. Graphical presentation of descriptive statistics for P<sub>O2</sub>, and D<sub>wv</sub> properties.

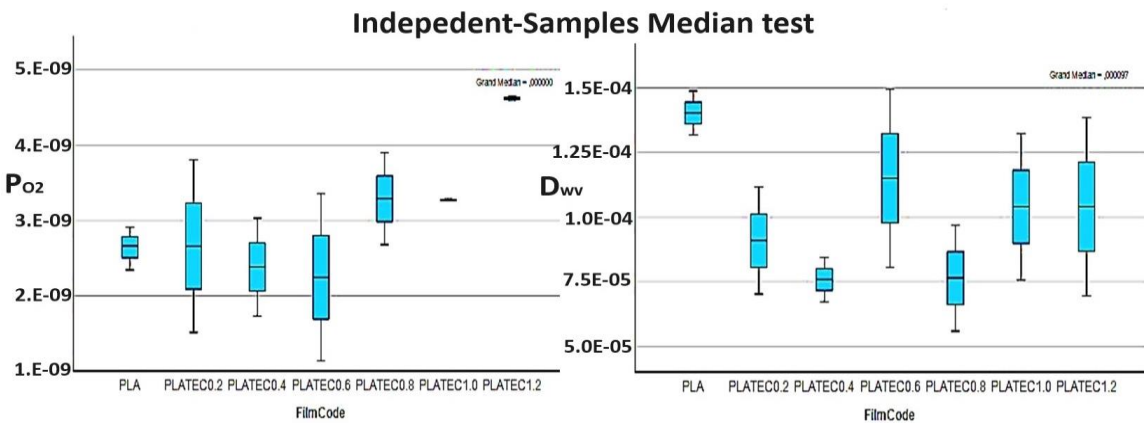

Figure S11. Graphical presentation of descriptive statistics for plasticizer migration (% weight loss), and antioxidant activity (EC<sub>50</sub>) properties.

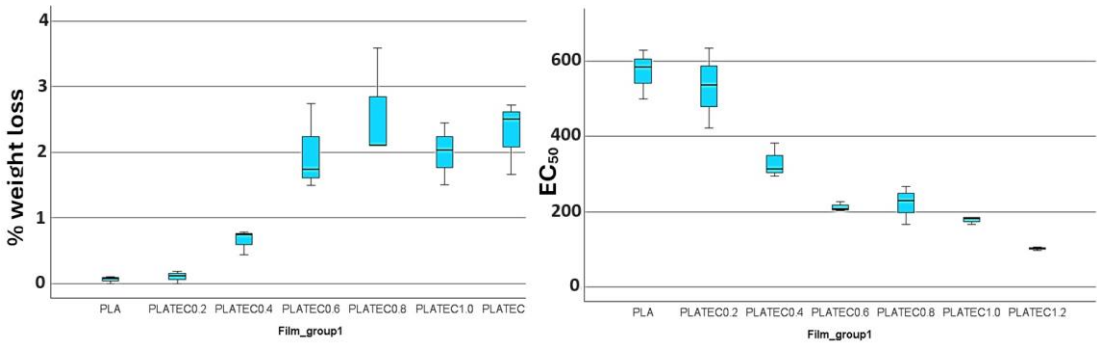

Figure S12. Graphical presentation of descriptive statistics for TBARS and Heme Iron indicators.

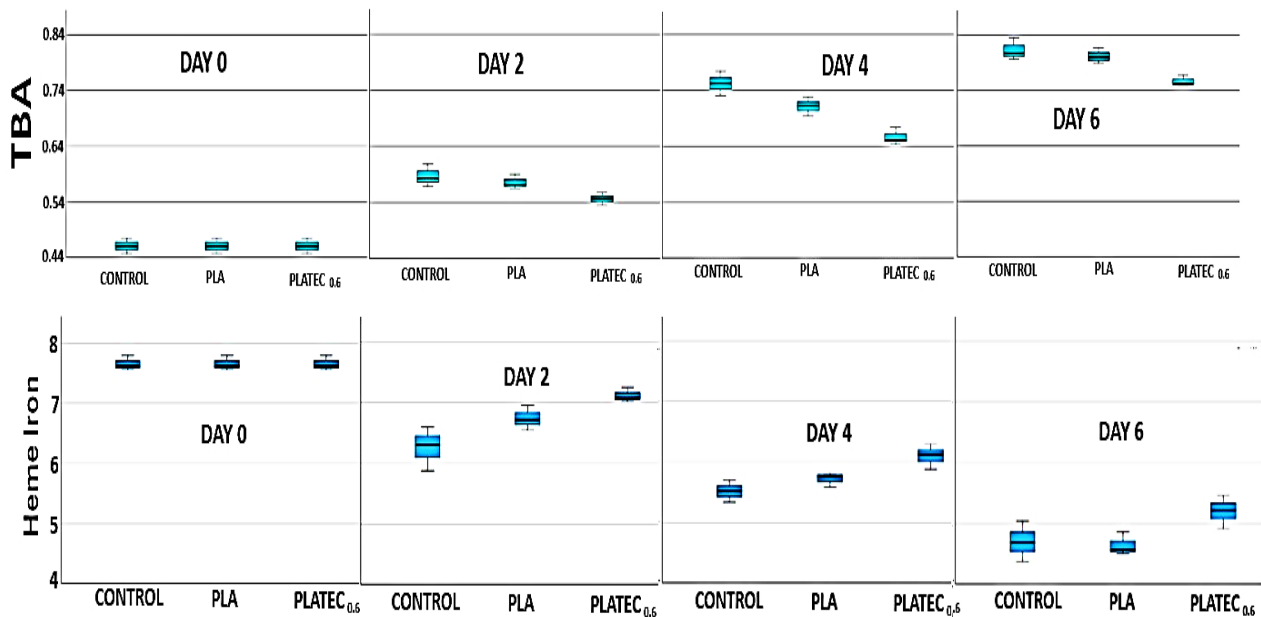

Figure S13. Graphical presentation of descriptive statistics for TVC experimental measurements

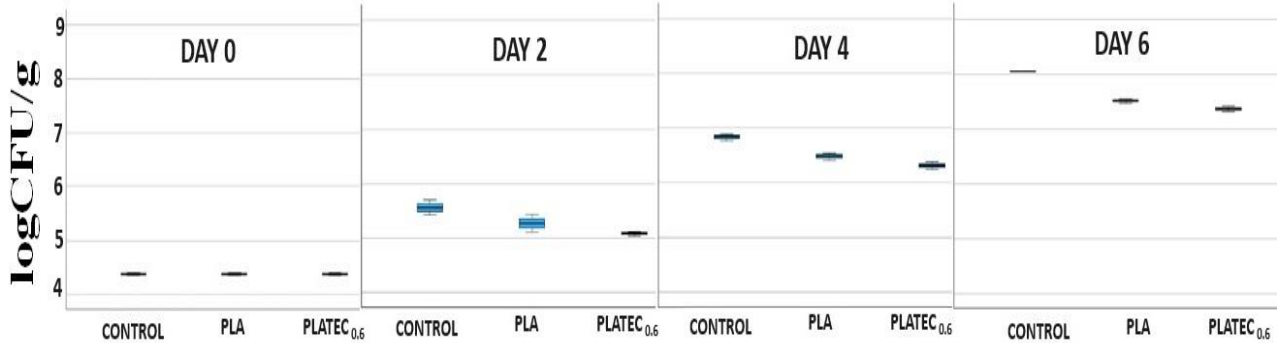

Figure S14. Graphical presentation of descriptive statistics for sensory indicator values.

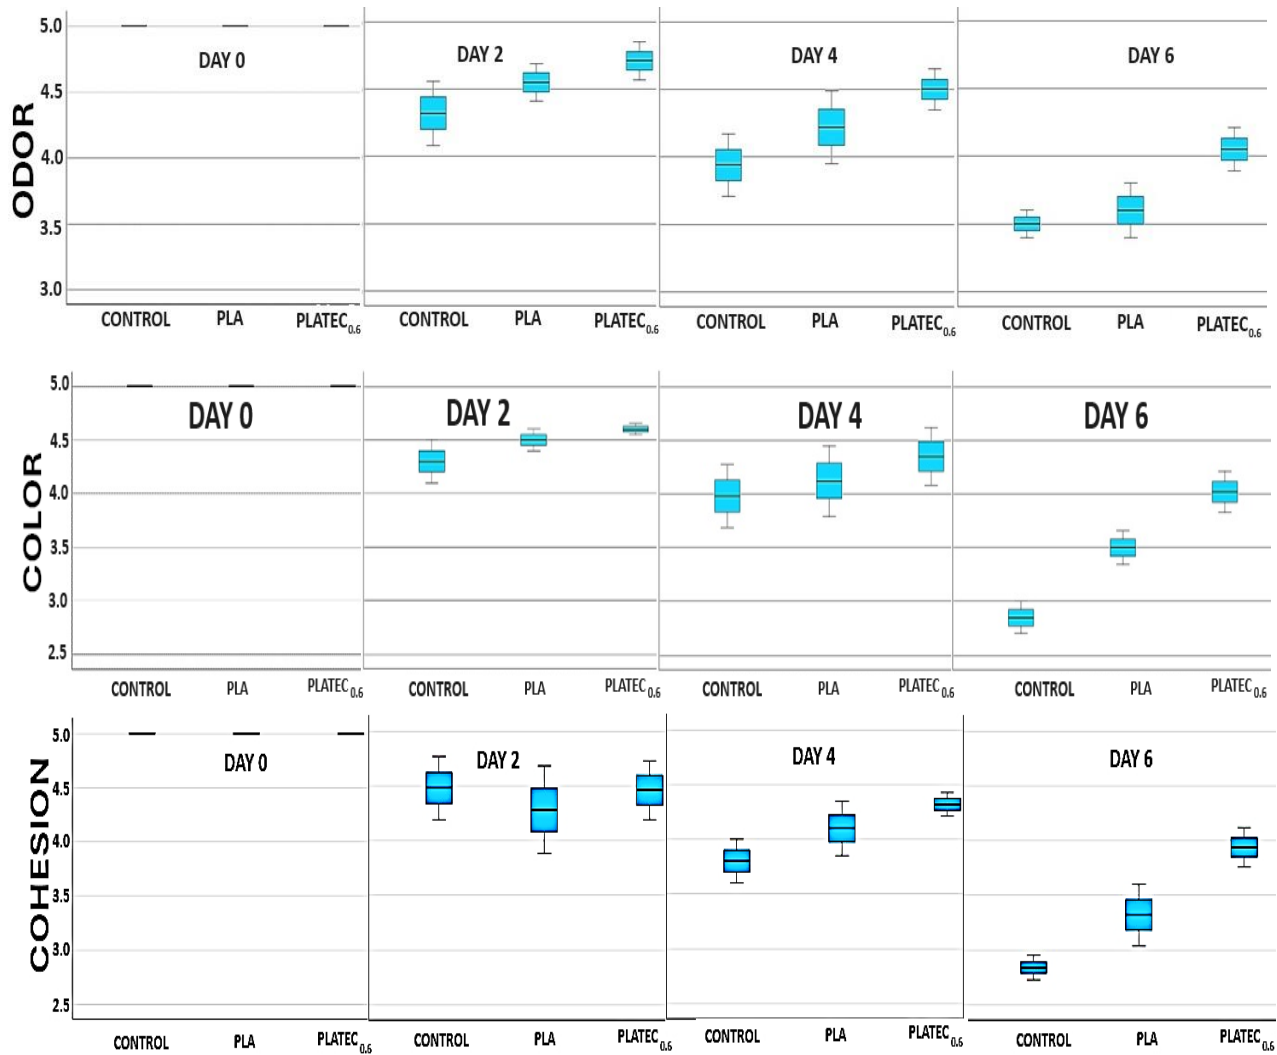

**Table S1:** Descriptive statistics for Young Modulus (E), Ultimate strength ( $\sigma_{\text{uts}}$ ), elongation at break ( $\epsilon\%$ )  
**Descriptives**

|   | Film_group2 |                                  |             | Statistic   | Std. Error |
|---|-------------|----------------------------------|-------------|-------------|------------|
| E | PLA         | Mean                             |             | 3102.0400   | 546.42919  |
|   |             | 95% Confidence Interval for Mean | Lower Bound | 1584.9094   |            |
|   |             |                                  | Upper Bound | 4619.1706   |            |
|   |             | 5% Trimmed Mean                  |             | 3126.8778   |            |
|   |             | Median                           |             | 3689.3000   |            |
|   |             | Variance                         |             | 1492924.273 |            |
|   |             | Std. Deviation                   |             | 1221.85280  |            |
|   |             | Minimum                          |             | 1480.00     |            |
|   |             | Maximum                          |             | 4277.00     |            |
|   |             | Range                            |             | 2797.00     |            |
|   | PLATEC0.2   | Interquartile Range              |             | 2294.45     |            |
|   |             | Skewness                         |             | -.635       | .913       |
|   |             | Kurtosis                         |             | -2.233      | 2.000      |
|   |             | Mean                             |             | 2832.5600   | 252.76117  |
|   |             | 95% Confidence Interval for Mean | Lower Bound | 2130.7825   |            |
|   |             |                                  | Upper Bound | 3534.3375   |            |
|   |             | 5% Trimmed Mean                  |             | 2830.3167   |            |
|   |             | Median                           |             | 2655.1000   |            |
|   |             | Variance                         |             | 319441.033  |            |
|   |             | Std. Deviation                   |             | 565.19115   |            |
|   | PLATEC0.4   | Minimum                          |             | 2187.00     |            |
|   |             | Maximum                          |             | 3518.50     |            |
|   |             | Range                            |             | 1331.50     |            |
|   |             | Interquartile Range              |             | 1083.85     |            |
|   |             | Skewness                         |             | .278        | .913       |
|   |             | Kurtosis                         |             | -2.279      | 2.000      |
|   |             | Mean                             |             | 2675.7800   | 216.57645  |
|   |             | 95% Confidence Interval for Mean | Lower Bound | 2074.4674   |            |
|   |             |                                  | Upper Bound | 3277.0926   |            |
|   |             | 5% Trimmed Mean                  |             | 2692.2333   |            |
|   | PLATEC0.6   | Median                           |             | 2785.5000   |            |
|   |             | Variance                         |             | 234526.792  |            |
|   |             | Std. Deviation                   |             | 484.27966   |            |
|   |             | Minimum                          |             | 1939.00     |            |
|   |             | Maximum                          |             | 3116.40     |            |
|   |             | Range                            |             | 1177.40     |            |
|   |             | Interquartile Range              |             | 881.70      |            |
|   |             | Skewness                         |             | -.967       | .913       |
|   |             | Kurtosis                         |             | .099        | 2.000      |
|   |             | Mean                             |             | 1438.7500   | 160.77747  |
|   | PLATEC0.8   | 95% Confidence Interval for Mean | Lower Bound | 927.0843    |            |
|   |             |                                  | Upper Bound | 1950.4157   |            |
|   |             | 5% Trimmed Mean                  |             | 1423.1667   |            |
|   |             | Median                           |             | 1298.5000   |            |
|   |             | Variance                         |             | 103397.583  |            |
|   |             | Std. Deviation                   |             | 321.55495   |            |
|   |             | Minimum                          |             | 1239.00     |            |
|   |             | Maximum                          |             | 1919.00     |            |
|   |             | Range                            |             | 680.00      |            |
|   |             | Interquartile Range              |             | 516.25      |            |
|   | PLATEC1.0   | Skewness                         |             | 1.948       | 1.014      |
|   |             | Kurtosis                         |             | 3.835       | 2.619      |
|   |             | Mean                             |             | 687.2000    | 100.91650  |
|   |             | 95% Confidence Interval for Mean | Lower Bound | 407.0109    |            |
|   |             |                                  | Upper Bound | 967.3891    |            |
|   |             | 5% Trimmed Mean                  |             | 678.3333    |            |
|   |             | Median                           |             | 632.0000    |            |
|   |             | Variance                         |             | 50920.700   |            |
|   |             | Std. Deviation                   |             | 225.65615   |            |
|   |             | Minimum                          |             | 482.00      |            |
|   |             | Maximum                          |             | 1052.00     |            |
|   |             | Range                            |             | 570.00      |            |
|   |             | Interquartile Range              |             | 385.00      |            |
|   |             | Skewness                         |             | 1.317       | .913       |
|   |             | Kurtosis                         |             | 1.658       | 2.000      |
|   | PLATEC1.0   | Mean                             |             | 375.8000    | 57.79048   |
|   |             | 95% Confidence Interval for Mean | Lower Bound | 215.3479    |            |
|   |             |                                  | Upper Bound | 536.2521    |            |
|   |             | 5% Trimmed Mean                  |             | 371.1667    |            |
|   |             | Median                           |             | 385.0000    |            |
|   |             | Variance                         |             | 16698.700   |            |
|   |             | Std. Deviation                   |             | 129.22345   |            |

|          |           |                                  |             |          |          |
|----------|-----------|----------------------------------|-------------|----------|----------|
|          | PLATEC1.2 | Minimum                          |             | 258.00   |          |
|          |           | Maximum                          |             | 577.00   |          |
|          |           | Range                            |             | 319.00   |          |
|          |           | Interquartile Range              |             | 223.00   |          |
|          |           | Skewness                         |             | 1.003    | .913     |
|          |           | Kurtosis                         |             | .861     | 2.000    |
|          |           | Mean                             |             | 239.0000 | 30.61590 |
|          |           | 95% Confidence Interval for Mean | Lower Bound | 107.2704 |          |
|          |           |                                  | Upper Bound | 370.7296 |          |
|          |           | 5% Trimmed Mean                  |             | .        |          |
|          |           | Median                           |             | 241.0000 |          |
|          |           | Variance                         |             | 2812.000 |          |
|          |           | Std. Deviation                   |             | 53.02829 |          |
|          |           | Minimum                          |             | 185.00   |          |
|          |           | Maximum                          |             | 291.00   |          |
|          |           | Range                            |             | 106.00   |          |
|          |           | Interquartile Range              |             | .        |          |
|          |           | Skewness                         |             | -.169    | 1.225    |
|          |           | Kurtosis                         |             | .        | .        |
| $\sigma$ | PLA       | Mean                             |             | 90.8920  | 11.09518 |
|          |           | 95% Confidence Interval for Mean | Lower Bound | 60.0868  |          |
|          |           |                                  | Upper Bound | 121.6972 |          |
|          |           | 5% Trimmed Mean                  |             | 90.6172  |          |
|          |           | Median                           |             | 84.3800  |          |
|          |           | Variance                         |             | 615.515  |          |
|          |           | Std. Deviation                   |             | 24.80958 |          |
|          |           | Minimum                          |             | 63.67    |          |
|          |           | Maximum                          |             | 123.06   |          |
|          |           | Range                            |             | 59.39    |          |
|          |           | Interquartile Range              |             | 47.62    |          |
|          |           | Skewness                         |             | .392     | .913     |
|          |           | Kurtosis                         |             | -1.960   | 2.000    |
|          | PLATEC0.2 | Mean                             |             | 51.1480  | 6.11492  |
|          |           | 95% Confidence Interval for Mean | Lower Bound | 34.1703  |          |
|          |           |                                  | Upper Bound | 68.1257  |          |
|          |           | 5% Trimmed Mean                  |             | 50.9461  |          |
|          |           | Median                           |             | 51.1600  |          |
|          |           | Variance                         |             | 186.961  |          |
|          |           | Std. Deviation                   |             | 13.67337 |          |
|          |           | Minimum                          |             | 37.63    |          |
|          |           | Maximum                          |             | 68.30    |          |
|          |           | Range                            |             | 30.67    |          |
|          |           | Interquartile Range              |             | 26.83    |          |
|          |           | Skewness                         |             | .182     | .913     |
|          |           | Kurtosis                         |             | -2.273   | 2.000    |
|          | PLATEC0.4 | Mean                             |             | 50.5480  | 10.32931 |
|          |           | 95% Confidence Interval for Mean | Lower Bound | 21.8692  |          |
|          |           |                                  | Upper Bound | 79.2268  |          |
|          |           | 5% Trimmed Mean                  |             | 50.3433  |          |
|          |           | Median                           |             | 45.2800  |          |
|          |           | Variance                         |             | 533.473  |          |
|          |           | Std. Deviation                   |             | 23.09704 |          |
|          |           | Minimum                          |             | 23.14    |          |
|          |           | Maximum                          |             | 81.64    |          |
|          |           | Range                            |             | 58.50    |          |
|          |           | Interquartile Range              |             | 43.16    |          |
|          |           | Skewness                         |             | .346     | .913     |
|          |           | Kurtosis                         |             | -1.078   | 2.000    |
|          | PLATEC0.6 | Mean                             |             | 29.4250  | 2.83200  |
|          |           | 95% Confidence Interval for Mean | Lower Bound | 20.4123  |          |
|          |           |                                  | Upper Bound | 38.4377  |          |
|          |           | 5% Trimmed Mean                  |             | 29.4800  |          |
|          |           | Median                           |             | 29.9200  |          |
|          |           | Variance                         |             | 32.081   |          |
|          |           | Std. Deviation                   |             | 5.66401  |          |
|          |           | Minimum                          |             | 22.60    |          |
|          |           | Maximum                          |             | 35.26    |          |
|          |           | Range                            |             | 12.66    |          |
|          |           | Interquartile Range              |             | 10.87    |          |
|          |           | Skewness                         |             | -.354    | 1.014    |
|          |           | Kurtosis                         |             | -2.275   | 2.619    |
|          | PLATEC0.8 | Mean                             |             | 17.5180  | 1.39541  |
|          |           | 95% Confidence Interval for Mean | Lower Bound | 13.6437  |          |
|          |           |                                  | Upper Bound | 21.3923  |          |
|          |           | 5% Trimmed Mean                  |             | 17.5150  |          |
|          |           | Median                           |             | 17.4800  |          |
|          |           | Variance                         |             | 9.736    |          |
|          |           | Std. Deviation                   |             | 3.12023  |          |

|           |                                  |                                  |             |          |
|-----------|----------------------------------|----------------------------------|-------------|----------|
|           |                                  | Minimum                          | 14.30       |          |
|           |                                  | Maximum                          | 20.79       |          |
|           |                                  | Range                            | 6.49        |          |
|           |                                  | Interquartile Range              | 6.23        |          |
|           |                                  | Skewness                         | .018        | .913     |
|           |                                  | Kurtosis                         | -2.966      | 2.000    |
| PLATEC1.0 |                                  | Mean                             | 18.9300     | 2.02295  |
|           | 95% Confidence Interval for Mean | Lower Bound                      | 13.3134     |          |
|           |                                  | Upper Bound                      | 24.5466     |          |
|           | 5% Trimmed Mean                  |                                  | 18.8289     |          |
|           | Median                           |                                  | 16.9100     |          |
|           | Variance                         |                                  | 20.462      |          |
|           | Std. Deviation                   |                                  | 4.52345     |          |
|           | Minimum                          |                                  | 14.89       |          |
|           | Maximum                          |                                  | 24.79       |          |
|           | Range                            |                                  | 9.90        |          |
| PLATEC1.2 |                                  | Interquartile Range              | 8.63        |          |
|           |                                  | Skewness                         | .609        | .913     |
|           |                                  | Kurtosis                         | -2.534      | 2.000    |
|           |                                  | Mean                             | 20.3967     | 2.11574  |
|           | 95% Confidence Interval for Mean | Lower Bound                      | 11.2934     |          |
|           |                                  | Upper Bound                      | 29.4999     |          |
|           | 5% Trimmed Mean                  |                                  | .           |          |
|           | Median                           |                                  | 21.7400     |          |
|           | Variance                         |                                  | 13.429      |          |
|           | Std. Deviation                   |                                  | 3.66456     |          |
|           |                                  | Minimum                          | 16.25       |          |
|           |                                  | Maximum                          | 23.20       |          |
|           |                                  | Range                            | 6.95        |          |
|           |                                  | Interquartile Range              | .           |          |
|           |                                  | Skewness                         | -1.428      | 1.225    |
|           |                                  | Kurtosis                         | .           | .        |
| ε         | PLA                              | Mean                             | 5,0460      | ,44270   |
|           |                                  | 95% Confidence Interval for Mean | Lower Bound | 3,8169   |
|           |                                  |                                  | Upper Bound | 6,2751   |
|           |                                  | 5% Trimmed Mean                  | 5,0178      |          |
|           |                                  | Median                           | 5,1800      |          |
|           |                                  | Variance                         | ,980        |          |
|           |                                  | Std. Deviation                   | ,98991      |          |
|           |                                  | Minimum                          | 4,09        |          |
|           |                                  | Maximum                          | 6,51        |          |
|           |                                  | Range                            | 2,42        |          |
|           |                                  | Interquartile Range              | 1,78        |          |
|           |                                  | Skewness                         | ,681        | ,913     |
|           |                                  | Kurtosis                         | -,126       | 2,000    |
|           | PLATEC0.2                        | Mean                             | 3,4060      | ,18052   |
|           |                                  | 95% Confidence Interval for Mean | Lower Bound | 2,9048   |
|           |                                  |                                  | Upper Bound | 3,9072   |
|           |                                  | 5% Trimmed Mean                  | 3,3994      |          |
|           |                                  | Median                           | 3,4200      |          |
|           |                                  | Variance                         | ,163        |          |
|           |                                  | Std. Deviation                   | ,40365      |          |
|           |                                  | Minimum                          | 2,97        |          |
|           |                                  | Maximum                          | 3,96        |          |
|           |                                  | Range                            | ,99         |          |
|           |                                  | Interquartile Range              | ,77         |          |
|           |                                  | Skewness                         | ,366        | ,913     |
|           |                                  | Kurtosis                         | -1,181      | 2,000    |
|           | PLATEC0.4                        | Mean                             | 4,0480      | ,96791   |
|           |                                  | 95% Confidence Interval for Mean | Lower Bound | 1,3606   |
|           |                                  |                                  | Upper Bound | 6,7354   |
|           |                                  | 5% Trimmed Mean                  | 3,9178      |          |
|           |                                  | Median                           | 3,1800      |          |
|           |                                  | Variance                         | 4,684       |          |
|           |                                  | Std. Deviation                   | 2,16432     |          |
|           |                                  | Minimum                          | 2,62        |          |
|           |                                  | Maximum                          | 7,82        |          |
|           |                                  | Range                            | 5,20        |          |
|           |                                  | Interquartile Range              | 3,16        |          |
|           |                                  | Skewness                         | 1,969       | ,913     |
|           |                                  | Kurtosis                         | 3,963       | 2,000    |
|           | PLATEC0.6                        | Mean                             | 52,6350     | 24,46090 |
|           |                                  | 95% Confidence Interval for Mean | Lower Bound | -25,2105 |
|           |                                  |                                  | Upper Bound | 130,4805 |

|           |  |                                  |                            |                     |
|-----------|--|----------------------------------|----------------------------|---------------------|
|           |  | 5% Trimmed Mean                  | 50,6000                    |                     |
|           |  | Median                           | 34,3200                    |                     |
|           |  | Variance                         | 2393,342                   |                     |
|           |  | Std. Deviation                   | 48,92179                   |                     |
|           |  | Minimum                          | 17,07                      |                     |
|           |  | Maximum                          | 124,83                     |                     |
|           |  | Range                            | 107,76                     |                     |
|           |  | Interquartile Range              | 82,83                      |                     |
|           |  | Skewness                         | 1,806                      | 1,014               |
|           |  | Kurtosis                         | 3,409                      | 2,619               |
| PLATEC0.8 |  | Mean                             | 58,6800                    | 3,05653             |
|           |  | 95% Confidence Interval for Mean | Lower Bound<br>Upper Bound | 50,1937<br>67,1663  |
|           |  | 5% Trimmed Mean                  | 58,7000                    |                     |
|           |  | Median                           | 58,8000                    |                     |
|           |  | Variance                         | 46,712                     |                     |
|           |  | Std. Deviation                   | 6,83462                    |                     |
|           |  | Minimum                          | 48,90                      |                     |
|           |  | Maximum                          | 68,10                      |                     |
|           |  | Range                            | 19,20                      |                     |
|           |  | Interquartile Range              | 10,70                      |                     |
| PLATEC1.0 |  | Mean                             | 68,2520                    | 23,79465            |
|           |  | 95% Confidence Interval for Mean | Lower Bound<br>Upper Bound | 2,1875<br>134,3165  |
|           |  | 5% Trimmed Mean                  | 66,5311                    |                     |
|           |  | Median                           | 48,0200                    |                     |
|           |  | Variance                         | 2830,927                   |                     |
|           |  | Std. Deviation                   | 53,20646                   |                     |
|           |  | Minimum                          | 15,64                      |                     |
|           |  | Maximum                          | 151,84                     |                     |
|           |  | Range                            | 136,20                     |                     |
|           |  | Interquartile Range              | 91,57                      |                     |
| PLATEC1.2 |  | Mean                             | 122,2767                   | 12,67994            |
|           |  | 95% Confidence Interval for Mean | Lower Bound<br>Upper Bound | 67,7193<br>176,8340 |
|           |  | 5% Trimmed Mean                  | .                          |                     |
|           |  | Median                           | 116,0500                   |                     |
|           |  | Variance                         | 482,343                    |                     |
|           |  | Std. Deviation                   | 21,96230                   |                     |
|           |  | Minimum                          | 104,10                     |                     |
|           |  | Maximum                          | 146,68                     |                     |
|           |  | Range                            | 42,58                      |                     |
|           |  | Interquartile Range              | .                          |                     |
|           |  | Skewness                         | 1,173                      | 1,225               |
|           |  | Kurtosis                         | .                          | .                   |

**Table S2:** Overall mean values significant difference hypothesis test using Median Test results for E,  $\sigma_{\text{uis}}$ ,  $\epsilon\%$

**Hypothesis Test Summary**

|   | Null Hypothesis                                                          | Test                            | Sig. <sup>a,b</sup> | Decision                    |
|---|--------------------------------------------------------------------------|---------------------------------|---------------------|-----------------------------|
| 1 | The medians of E are the same across categories of Film_group2.          | Independent-Samples Median Test | <.001               | Reject the null hypothesis. |
| 2 | The medians of $\sigma$ are the same across categories of Film_group2.   | Independent-Samples Median Test | <.001               | Reject the null hypothesis. |
| 3 | The medians of $\epsilon$ are the same across categories of Film_group2. | Independent-Samples Median Test | <.001               | Reject the null hypothesis. |

a. The significance level is .050.

b. Asymptotic significance is displayed.

**Table S3:** Paiwise mean values significant difference hypothesis test using Median Test results for Young Modulus E  
**Pairwise Comparisons of Film\_group2**

| Sample 1-Sample 2 | Test Statistic | Sig. | Adj. Sig. <sup>a</sup> |
|-------------------|----------------|------|------------------------|
|-------------------|----------------|------|------------------------|

|                     |        |      |       |
|---------------------|--------|------|-------|
| PLATEC1.2-PLATEC1.0 | .533   | .465 | 1.000 |
| PLATEC1.2-PLATEC0.8 | 4.800  | .028 | .598  |
| PLATEC1.2-PLATEC0.6 | 3.938  | .047 | .992  |
| PLATEC1.2-PLATEC0.2 | 4.800  | .028 | .598  |
| PLATEC1.2-PLATEC0.4 | 4.800  | .028 | .598  |
| PLATEC1.2-PLA       | 4.800  | .028 | .598  |
| PLATEC1.0-PLATEC0.8 | 3.600  | .058 | 1.000 |
| PLATEC1.0-PLATEC0.6 | 9.000  | .003 | .057  |
| PLATEC1.0-PLATEC0.2 | 10.000 | .002 | .033  |
| PLATEC1.0-PLATEC0.4 | 10.000 | .002 | .033  |
| PLATEC1.0-PLA       | 10.000 | .002 | .033  |
| PLATEC0.8-PLATEC0.6 | 9.000  | .003 | .057  |
| PLATEC0.8-PLATEC0.2 | 10.000 | .002 | .033  |
| PLATEC0.8-PLATEC0.4 | 10.000 | .002 | .033  |
| PLATEC0.8-PLA       | 10.000 | .002 | .033  |
| PLATEC0.6-PLATEC0.2 | 5.760  | .016 | .344  |
| PLATEC0.6-PLATEC0.4 | 5.760  | .016 | .344  |
| PLATEC0.6-PLA       | 5.760  | .016 | .344  |
| PLATEC0.2-PLATEC0.4 | .400   | .527 | 1.000 |
| PLATEC0.2-PLA       | .400   | .527 | 1.000 |
| PLATEC0.4-PLA       | .400   | .527 | 1.000 |

Each row tests the null hypothesis that the Sample 1 and Sample 2 distributions are the same.

Asymptotic significances (2-sided tests) are displayed. The significance level is .050.

a. Significance values have been adjusted by the Bonferroni correction for multiple tests.

**Table S4:** Pairwise mean values significant difference hypothesis test using Median Test results for Ultimate Strength  $\sigma_{\text{uts}}$ .

Pairwise Comparisons of Film\_group2

| Sample 1-Sample 2   | Test Statistic | Sig. | Adj. Sig. <sup>a</sup> |
|---------------------|----------------|------|------------------------|
| PLATEC1.0-PLATEC0.8 | .400           | .527 | 1.000                  |
| PLATEC1.0-PLATEC1.2 | .533           | .465 | 1.000                  |
| PLATEC1.0-PLATEC0.6 | 2.723          | .099 | 1.000                  |
| PLATEC1.0-PLATEC0.4 | 3.600          | .058 | 1.000                  |
| PLATEC1.0-PLATEC0.2 | 10.000         | .002 | .033                   |
| PLATEC1.0-PLA       | 10.000         | .002 | .033                   |
| PLATEC0.8-PLATEC1.2 | .533           | .465 | 1.000                  |
| PLATEC0.8-PLATEC0.6 | 9.000          | .003 | .057                   |
| PLATEC0.8-PLATEC0.4 | 10.000         | .002 | .033                   |
| PLATEC0.8-PLATEC0.2 | 10.000         | .002 | .033                   |
| PLATEC0.8-PLA       | 10.000         | .002 | .033                   |
| PLATEC1.2-PLATEC0.6 | 3.938          | .047 | .992                   |
| PLATEC1.2-PLATEC0.4 | 4.800          | .028 | .598                   |
| PLATEC1.2-PLATEC0.2 | 4.800          | .028 | .598                   |
| PLATEC1.2-PLA       | 4.800          | .028 | .598                   |
| PLATEC0.6-PLATEC0.4 | 5.760          | .016 | .344                   |
| PLATEC0.6-PLATEC0.2 | 5.760          | .016 | .344                   |
| PLATEC0.6-PLA       | 5.760          | .016 | .344                   |
| PLATEC0.4-PLATEC0.2 | .400           | .527 | 1.000                  |
| PLATEC0.4-PLA       | 3.600          | .058 | 1.000                  |
| PLATEC0.2-PLA       | 3.600          | .058 | 1.000                  |

Each row tests the null hypothesis that the Sample 1 and Sample 2 distributions are the same.

Asymptotic significances (2-sided tests) are displayed. The significance level is .050.

a. Significance values have been adjusted by the Bonferroni correction for multiple tests.

**Table S5:** Pairwise mean values significant difference hypothesis test using Median Test results for elongation at break  $\epsilon\%$ .

Pairwise Comparisons of Film\_group2

| Sample 1-Sample 2   | Test Statistic | Sig. | Adj. Sig. <sup>a</sup> |
|---------------------|----------------|------|------------------------|
| PLATEC0.4-PLATEC0.2 | .400           | .527 | 1.000                  |
| PLATEC0.4-PLA       | 3.600          | .058 | 1.000                  |
| PLATEC0.4-PLATEC0.6 | 9.000          | .003 | .057                   |
| PLATEC0.4-PLATEC1.0 | 10.000         | .002 | .033                   |
| PLATEC0.4-PLATEC0.8 | 10.000         | .002 | .033                   |
| PLATEC0.4-PLATEC1.2 | 4.800          | .028 | .598                   |
| PLATEC0.2-PLA       | 10.000         | .002 | .033                   |
| PLATEC0.2-PLATEC0.6 | 9.000          | .003 | .057                   |
| PLATEC0.2-PLATEC1.0 | 10.000         | .002 | .033                   |
| PLATEC0.2-PLATEC0.8 | 10.000         | .002 | .033                   |
| PLATEC0.2-PLATEC1.2 | 4.800          | .028 | .598                   |
| PLA-PLATEC0.6       | 9.000          | .003 | .057                   |
| PLA-PLATEC1.0       | 10.000         | .002 | .033                   |

|                     |        |      |       |
|---------------------|--------|------|-------|
| PLA-PLATEC0.8       | 10,000 | ,002 | ,033  |
| PLA-PLATEC1.2       | 4,800  | ,028 | ,598  |
| PLATEC0.6-PLATEC1.0 | 1,103  | ,294 | 1,000 |
| PLATEC0.6-PLATEC0.8 | 1,103  | ,294 | 1,000 |
| PLATEC0.6-PLATEC1.2 | 1,215  | ,270 | 1,000 |
| PLATEC1.0-PLATEC0.8 | ,400   | ,527 | 1,000 |
| PLATEC1.0-PLATEC1.2 | 4,800  | ,028 | ,598  |
| PLATEC0.8-PLATEC1.2 | 4,800  | ,028 | ,598  |

Each row tests the null hypothesis that the Sample 1 and Sample 2 distributions are the same.

Asymptotic significances (2-sided tests) are displayed. The significance level is ,050.

a. Significance values have been adjusted by the Bonferroni correction for multiple tests.

**Table S6:** Descriptive statistics for Oxygen Permeability Coefficient ( $P_{O_2}$ ), Water/Vapor Diffusion Coefficient ( $D_{wv}$ ),  $EC_{50}$ , % weight loss  
**Descriptives<sup>a,b,c,d</sup>**

| Film_group1 |           | Statistic                        |             | Std. Error      |
|-------------|-----------|----------------------------------|-------------|-----------------|
| PeO2        | PLA       | Mean                             |             | 2.6381467e-009  |
|             |           | 95% Confidence Interval for Mean | Lower Bound | 1.9366769e-009  |
|             |           |                                  | Upper Bound | 3.3396164e-009  |
|             |           | 5% Trimmed Mean                  |             | .               |
|             |           | Median                           |             | 2.6625900e-009  |
|             |           | Variance                         |             | .000            |
|             |           | Std. Deviation                   |             | 2.82379567e-010 |
|             |           | Minimum                          |             | 2.34434e-009    |
|             |           | Maximum                          |             | 2.90751e-009    |
|             |           | Range                            |             | 5.63170e-010    |
|             |           | Interquartile Range              |             | .               |
|             |           | Skewness                         |             | -.387           |
|             |           | Kurtosis                         |             | .               |
|             | PLATEC0.2 | Mean                             |             | 2.6586533e-009  |
|             |           | 95% Confidence Interval for Mean | Lower Bound | -1.8542351e-010 |
|             |           |                                  | Upper Bound | 5.5027302e-009  |
|             |           | 5% Trimmed Mean                  |             | .               |
|             |           | Median                           |             | 2.6586500e-009  |
|             |           | Variance                         |             | .000            |
|             |           | Std. Deviation                   |             | 1.14489500e-009 |
|             |           | Minimum                          |             | 1.51376e-009    |
|             |           | Maximum                          |             | 3.80355e-009    |
|             |           | Range                            |             | 2.28979e-009    |
|             |           | Interquartile Range              |             | .               |
|             |           | Skewness                         |             | .000            |
|             |           | Kurtosis                         |             | .               |
|             | PLATEC0.4 | Mean                             |             | 2.3816233e-009  |
|             |           | 95% Confidence Interval for Mean | Lower Bound | 7.7156674e-010  |
|             |           |                                  | Upper Bound | 3.9916799e-009  |
|             |           | 5% Trimmed Mean                  |             | .               |
|             |           | Median                           |             | 2.3816200e-009  |
|             |           | Variance                         |             | .000            |
|             |           | Std. Deviation                   |             | 6.48135000e-010 |
|             |           | Minimum                          |             | 1.73349e-009    |
|             |           | Maximum                          |             | 3.02976e-009    |
|             |           | Range                            |             | 1.29627e-009    |
|             |           | Interquartile Range              |             | .               |
|             |           | Skewness                         |             | .000            |
|             |           | Kurtosis                         |             | .               |
|             | PLATEC0.6 | Mean                             |             | 2.2438933e-009  |
|             |           | 95% Confidence Interval for Mean | Lower Bound | -5.0928891e-010 |
|             |           |                                  | Upper Bound | 4.9970756e-009  |
|             |           | 5% Trimmed Mean                  |             | .               |
|             |           | Median                           |             | 2.2438900e-009  |
|             |           | Variance                         |             | .000            |
|             |           | Std. Deviation                   |             | 1.10830500e-009 |
|             |           | Minimum                          |             | 1.13559e-009    |
|             |           | Maximum                          |             | 3.35220e-009    |
|             |           | Range                            |             | 2.21661e-009    |
|             |           | Interquartile Range              |             | .               |
|             |           | Skewness                         |             | .000            |
|             |           | Kurtosis                         |             | .               |
|             | PLATEC0.8 | Mean                             |             | 3.2882400e-009  |
|             |           | 95% Confidence Interval for Mean | Lower Bound | 1.7768409e-009  |
|             |           |                                  | Upper Bound | 4.7996391e-009  |



|     |           |                                  |             |                 |                 |
|-----|-----------|----------------------------------|-------------|-----------------|-----------------|
|     |           | 5% Trimmed Mean                  |             | .               |                 |
|     |           | Median                           |             | 3.2882400e-009  |                 |
|     |           | Variance                         |             | .000            |                 |
|     |           | Std. Deviation                   |             | 6.08420000e-010 |                 |
|     |           | Minimum                          |             | 2.67982e-009    |                 |
|     |           | Maximum                          |             | 3.89666e-009    |                 |
|     |           | Range                            |             | 1.21684e-009    |                 |
|     |           | Interquartile Range              |             | .               |                 |
|     |           | Skewness                         |             | .000            | 1.225           |
|     |           | Kurtosis                         |             | .               |                 |
|     | PLATEC1.0 | Mean                             |             | 3.2711200e-009  | 8.74108308e-012 |
|     |           | 95% Confidence Interval for Mean | Lower Bound | 3.2335102e-009  |                 |
|     |           |                                  | Upper Bound | 3.3087298e-009  |                 |
|     |           | 5% Trimmed Mean                  |             | .               |                 |
|     |           | Median                           |             | 3.2711200e-009  |                 |
|     |           | Variance                         |             | .000            |                 |
|     |           | Std. Deviation                   |             | 1.51400000e-011 |                 |
|     |           | Minimum                          |             | 3.25598e-009    |                 |
|     |           | Maximum                          |             | 3.28626e-009    |                 |
|     |           | Range                            |             | 3.02800e-011    |                 |
|     |           | Interquartile Range              |             | .               |                 |
|     |           | Skewness                         |             | .000            | 1.225           |
|     |           | Kurtosis                         |             | .               |                 |
|     | PLATEC1.2 | Mean                             |             | 4.6219733e-009  | 1.53201418e-011 |
|     |           | 95% Confidence Interval for Mean | Lower Bound | 4.5560561e-009  |                 |
|     |           |                                  | Upper Bound | 4.6878906e-009  |                 |
|     |           | 5% Trimmed Mean                  |             | .               |                 |
|     |           | Median                           |             | 4.6221100e-009  |                 |
|     |           | Variance                         |             | .000            |                 |
|     |           | Std. Deviation                   |             | 2.65352640e-011 |                 |
|     |           | Minimum                          |             | 4.59537e-009    |                 |
|     |           | Maximum                          |             | 4.64844e-009    |                 |
|     |           | Range                            |             | 5.30700e-011    |                 |
|     |           | Interquartile Range              |             | .               |                 |
|     |           | Skewness                         |             | -.023           | 1.225           |
|     |           | Kurtosis                         |             | .               |                 |
| Dwv | PLA       | Mean                             |             | 1.4030000e-004  | 4.90747729e-006 |
|     |           | 95% Confidence Interval for Mean | Lower Bound | 1.1918483e-004  |                 |
|     |           |                                  | Upper Bound | 1.6141517e-004  |                 |
|     |           | 5% Trimmed Mean                  |             | .               |                 |
|     |           | Median                           |             | 1.4030000e-004  |                 |
|     |           | Variance                         |             | .000            |                 |
|     |           | Std. Deviation                   |             | 8.50000000e-006 |                 |
|     |           | Minimum                          |             | 1.31800e-004    |                 |
|     |           | Maximum                          |             | 1.48800e-004    |                 |
|     |           | Range                            |             | 1.70000e-005    |                 |
|     |           | Interquartile Range              |             | .               |                 |
|     |           | Skewness                         |             | .000            | 1.225           |
|     |           | Kurtosis                         |             | .               |                 |
|     | PLATEC0.2 | Mean                             |             | 9.0900000e-005  | 1.19511506e-005 |
|     |           | 95% Confidence Interval for Mean | Lower Bound | 3.9478349e-005  |                 |
|     |           |                                  | Upper Bound | 1.4232165e-004  |                 |
|     |           | 5% Trimmed Mean                  |             | .               |                 |
|     |           | Median                           |             | 9.0900000e-005  |                 |
|     |           | Variance                         |             | .000            |                 |
|     |           | Std. Deviation                   |             | 2.07000000e-005 |                 |
|     |           | Minimum                          |             | 7.02000e-005    |                 |
|     |           | Maximum                          |             | 1.11600e-004    |                 |
|     |           | Range                            |             | 4.14000e-005    |                 |
|     |           | Interquartile Range              |             | .               |                 |
|     |           | Skewness                         |             | .000            | 1.225           |
|     |           | Kurtosis                         |             | .               |                 |
|     | PLATEC0.4 | Mean                             |             | 7.5800000e-005  | 4.96521232e-006 |
|     |           | 95% Confidence Interval for Mean | Lower Bound | 5.4436416e-005  |                 |
|     |           |                                  | Upper Bound | 9.7163584e-005  |                 |
|     |           | 5% Trimmed Mean                  |             | .               |                 |
|     |           | Median                           |             | 7.5800000e-005  |                 |
|     |           | Variance                         |             | .000            |                 |
|     |           | Std. Deviation                   |             | 8.60000000e-006 |                 |
|     |           | Minimum                          |             | 6.72000e-005    |                 |
|     |           | Maximum                          |             | 8.44000e-005    |                 |

|      |           |  |                                  |             |                |                 |
|------|-----------|--|----------------------------------|-------------|----------------|-----------------|
| EC50 | PLA       |  | Range                            |             | 1.72000e-005   |                 |
|      |           |  | Interquartile Range              |             | .              |                 |
|      |           |  | Skewness                         |             | .000           | 1.225           |
|      |           |  | Kurtosis                         |             | .              | .               |
|      |           |  | Mean                             |             | 1.1500000e-004 | 1.99185843e-005 |
|      |           |  | 95% Confidence Interval for Mean | Lower Bound | 2.9297249e-005 |                 |
|      |           |  |                                  | Upper Bound | 2.0070275e-004 |                 |
|      |           |  | 5% Trimmed Mean                  |             | .              |                 |
|      |           |  | Median                           |             | 1.1500000e-004 |                 |
|      |           |  | Variance                         |             | .000           |                 |
|      |           |  | Std. Deviation                   |             | 3.4500000e-005 |                 |
|      |           |  | Minimum                          |             | 8.05000e-005   |                 |
|      |           |  | Maximum                          |             | 1.49500e-004   |                 |
|      |           |  | Range                            |             | 6.90000e-005   |                 |
|      |           |  | Interquartile Range              |             | .              |                 |
|      |           |  | Skewness                         |             | .000           | 1.225           |
|      |           |  | Kurtosis                         |             | .              | .               |
|      |           |  | Mean                             |             | 7.6400000e-005 | 1.18356805e-005 |
|      |           |  | 95% Confidence Interval for Mean | Lower Bound | 2.5475177e-005 |                 |
|      |           |  |                                  | Upper Bound | 1.2732482e-004 |                 |
|      |           |  | 5% Trimmed Mean                  |             | .              |                 |
|      |           |  | Median                           |             | 7.6400000e-005 |                 |
|      |           |  | Variance                         |             | .000           |                 |
|      |           |  | Std. Deviation                   |             | 2.0500000e-005 |                 |
|      |           |  | Minimum                          |             | 5.59000e-005   |                 |
|      |           |  | Maximum                          |             | 9.69000e-005   |                 |
|      |           |  | Range                            |             | 4.10000e-005   |                 |
|      |           |  | Interquartile Range              |             | .              |                 |
|      |           |  | Skewness                         |             | .000           | 1.225           |
|      |           |  | Kurtosis                         |             | .              | .               |
| EC50 | PLA       |  | Mean                             |             | 1.0400000e-004 | 1.63967476e-005 |
|      |           |  | 95% Confidence Interval for Mean | Lower Bound | 3.3450489e-005 |                 |
|      |           |  |                                  | Upper Bound | 1.7454951e-004 |                 |
|      |           |  | 5% Trimmed Mean                  |             | .              |                 |
|      |           |  | Median                           |             | 1.0400000e-004 |                 |
|      |           |  | Variance                         |             | .000           |                 |
|      |           |  | Std. Deviation                   |             | 2.8400000e-005 |                 |
|      |           |  | Minimum                          |             | 7.56000e-005   |                 |
|      |           |  | Maximum                          |             | 1.32400e-004   |                 |
|      |           |  | Range                            |             | 5.68000e-005   |                 |
|      |           |  | Interquartile Range              |             | .              |                 |
|      |           |  | Skewness                         |             | .000           | 1.225           |
|      |           |  | Kurtosis                         |             | .              | .               |
|      |           |  | Mean                             |             | 1.0400000e-004 | 1.99185843e-005 |
|      |           |  | 95% Confidence Interval for Mean | Lower Bound | 1.8297249e-005 |                 |
|      |           |  |                                  | Upper Bound | 1.8970275e-004 |                 |
|      |           |  | 5% Trimmed Mean                  |             | .              |                 |
|      |           |  | Median                           |             | 1.0400000e-004 |                 |
|      |           |  | Variance                         |             | .000           |                 |
|      |           |  | Std. Deviation                   |             | 3.4500000e-005 |                 |
|      |           |  | Minimum                          |             | 6.95000e-005   |                 |
|      |           |  | Maximum                          |             | 1.38500e-004   |                 |
|      |           |  | Range                            |             | 6.90000e-005   |                 |
|      |           |  | Interquartile Range              |             | .              |                 |
|      |           |  | Skewness                         |             | .000           | 1.225           |
|      |           |  | Kurtosis                         |             | .              | .               |
|      |           |  | Mean                             |             | 571.3567       | 37.81034        |
|      |           |  | 95% Confidence Interval for Mean | Lower Bound | 408.6719       |                 |
|      |           |  |                                  | Upper Bound | 734.0414       |                 |
|      |           |  | 5% Trimmed Mean                  |             | .              |                 |
|      |           |  | Median                           |             | 584.2200       |                 |
|      |           |  | Variance                         |             | 4288.865       |                 |
|      |           |  | Std. Deviation                   |             | 65.48943       |                 |
|      |           |  | Minimum                          |             | 500.39         |                 |
|      |           |  | Maximum                          |             | 629.46         |                 |
|      |           |  | Range                            |             | 129.07         |                 |
|      |           |  | Interquartile Range              |             | .              |                 |
|      |           |  | Skewness                         |             | -.850          | 1.225           |
|      |           |  | Kurtosis                         |             | .              | .               |
|      | PLATEC0.2 |  | Mean                             |             | 531.9833       | 61.74068        |
|      |           |  | 95% Confidence Interval for Mean | Lower Bound | 266.3346       |                 |

|  |           |                                  |             |          |
|--|-----------|----------------------------------|-------------|----------|
|  |           | Upper Bound                      | 797.6321    |          |
|  |           | 5% Trimmed Mean                  | .           |          |
|  |           | Median                           | 538.1400    |          |
|  |           | Variance                         | 11435.736   |          |
|  |           | Std. Deviation                   | 106.93800   |          |
|  |           | Minimum                          | 422.10      |          |
|  |           | Maximum                          | 635.71      |          |
|  |           | Range                            | 213.61      |          |
|  |           | Interquartile Range              | .           |          |
|  |           | Skewness                         | -.258       | 1.225    |
|  |           | Kurtosis                         | .           | .        |
|  | PLATEC0.4 | Mean                             | 330.8167    | 26.95398 |
|  |           | 95% Confidence Interval for Mean | Lower Bound | 214.8431 |
|  |           |                                  | Upper Bound | 446.7903 |
|  |           | 5% Trimmed Mean                  | .           |          |
|  |           | Median                           | 314.6800    |          |
|  |           | Variance                         | 2179.551    |          |
|  |           | Std. Deviation                   | 46.68566    |          |
|  |           | Minimum                          | 294.34      |          |
|  |           | Maximum                          | 383.43      |          |
|  |           | Range                            | 89.09       |          |
|  |           | Interquartile Range              | .           |          |
|  |           | Skewness                         | 1.370       | 1.225    |
|  |           | Kurtosis                         | .           | .        |
|  | PLATEC0.6 | Mean                             | 212.5733    | 7.00485  |
|  |           | 95% Confidence Interval for Mean | Lower Bound | 182.4339 |
|  |           |                                  | Upper Bound | 242.7128 |
|  |           | 5% Trimmed Mean                  | .           |          |
|  |           | Median                           | 208.0400    |          |
|  |           | Variance                         | 147.204     |          |
|  |           | Std. Deviation                   | 12.13275    |          |
|  |           | Minimum                          | 203.36      |          |
|  |           | Maximum                          | 226.32      |          |
|  |           | Range                            | 22.96       |          |
|  |           | Interquartile Range              | .           |          |
|  |           | Skewness                         | 1.447       | 1.225    |
|  |           | Kurtosis                         | .           | .        |
|  | PLATEC0.8 | Mean                             | 220.4867    | 29.58098 |
|  |           | 95% Confidence Interval for Mean | Lower Bound | 93.2100  |
|  |           |                                  | Upper Bound | 347.7634 |
|  |           | 5% Trimmed Mean                  | .           |          |
|  |           | Median                           | 229.0200    |          |
|  |           | Variance                         | 2625.103    |          |
|  |           | Std. Deviation                   | 51.23576    |          |
|  |           | Minimum                          | 165.52      |          |
|  |           | Maximum                          | 266.92      |          |
|  |           | Range                            | 101.40      |          |
|  |           | Interquartile Range              | .           |          |
|  |           | Skewness                         | -.729       | 1.225    |
|  |           | Kurtosis                         | .           | .        |
|  | PLATEC1.0 | Mean                             | 177.9567    | 5.96601  |
|  |           | 95% Confidence Interval for Mean | Lower Bound | 152.2870 |
|  |           |                                  | Upper Bound | 203.6263 |
|  |           | 5% Trimmed Mean                  | .           |          |
|  |           | Median                           | 182.8100    |          |
|  |           | Variance                         | 106.780     |          |
|  |           | Std. Deviation                   | 10.33343    |          |
|  |           | Minimum                          | 166.09      |          |
|  |           | Maximum                          | 184.97      |          |
|  |           | Range                            | 18.88       |          |
|  |           | Interquartile Range              | .           |          |
|  |           | Skewness                         | -1.647      | 1.225    |
|  |           | Kurtosis                         | .           | .        |
|  | PLATEC1.2 | Mean                             | 101.7933    | 2.62038  |
|  |           | 95% Confidence Interval for Mean | Lower Bound | 90.5187  |
|  |           |                                  | Upper Bound | 113.0679 |
|  |           | 5% Trimmed Mean                  | .           |          |
|  |           | Median                           | 102.8800    |          |
|  |           | Variance                         | 20.599      |          |
|  |           | Std. Deviation                   | 4.53864     |          |
|  |           | Minimum                          | 96.81       |          |

|     |           |                                  |             |        |        |
|-----|-----------|----------------------------------|-------------|--------|--------|
| W.L | PLA       | Maximum                          |             | 105.69 |        |
|     |           | Range                            |             | 8.88   |        |
|     |           | Interquartile Range              |             | .      |        |
|     |           | Skewness                         |             | -1.016 | 1.225  |
|     |           | Kurtosis                         |             | .      | .      |
|     |           | Mean                             |             | .0600  | .03055 |
|     |           | 95% Confidence Interval for Mean | Lower Bound | -.0714 |        |
|     |           |                                  | Upper Bound | .1914  |        |
|     |           | 5% Trimmed Mean                  |             | .      |        |
|     |           | Median                           |             | .0800  |        |
|     |           | Variance                         |             | .003   |        |
|     |           | Std. Deviation                   |             | .05292 |        |
|     |           | Minimum                          |             | .00    |        |
|     |           | Maximum                          |             | .10    |        |
|     |           | Range                            |             | .10    |        |
|     |           | Interquartile Range              |             | .      |        |
|     |           | Skewness                         |             | -1.458 | 1.225  |
|     |           | Kurtosis                         |             | .      | .      |
|     | PLATEC0.2 | Mean                             |             | .1033  | .05548 |
|     |           | 95% Confidence Interval for Mean | Lower Bound | -.1354 |        |
|     |           |                                  | Upper Bound | .3420  |        |
|     |           | 5% Trimmed Mean                  |             | .      |        |
|     |           | Median                           |             | .1200  |        |
|     |           | Variance                         |             | .009   |        |
|     |           | Std. Deviation                   |             | .09609 |        |
|     |           | Minimum                          |             | .00    |        |
|     |           | Maximum                          |             | .19    |        |
|     |           | Range                            |             | .19    |        |
|     |           | Interquartile Range              |             | .      |        |
|     |           | Skewness                         |             | -.757  | 1.225  |
|     |           | Kurtosis                         |             | .      | .      |
|     | PLATEC0.4 | Mean                             |             | .6567  | .10868 |
|     |           | 95% Confidence Interval for Mean | Lower Bound | .1891  |        |
|     |           |                                  | Upper Bound | 1.1243 |        |
|     |           | 5% Trimmed Mean                  |             | .      |        |
|     |           | Median                           |             | .7500  |        |
|     |           | Variance                         |             | .035   |        |
|     |           | Std. Deviation                   |             | .18824 |        |
|     |           | Minimum                          |             | .44    |        |
|     |           | Maximum                          |             | .78    |        |
|     |           | Range                            |             | .34    |        |
|     |           | Interquartile Range              |             | .      |        |
|     |           | Skewness                         |             | -1.683 | 1.225  |
|     |           | Kurtosis                         |             | .      | .      |
|     | PLATEC0.6 | Mean                             |             | 1.9900 | .38188 |
|     |           | 95% Confidence Interval for Mean | Lower Bound | .3469  |        |
|     |           |                                  | Upper Bound | 3.6331 |        |
|     |           | 5% Trimmed Mean                  |             | .      |        |
|     |           | Median                           |             | 1.7400 |        |
|     |           | Variance                         |             | .438   |        |
|     |           | Std. Deviation                   |             | .66144 |        |
|     |           | Minimum                          |             | 1.49   |        |
|     |           | Maximum                          |             | 2.74   |        |
|     |           | Range                            |             | 1.25   |        |
|     |           | Interquartile Range              |             | .      |        |
|     |           | Skewness                         |             | 1.458  | 1.225  |
|     |           | Kurtosis                         |             | .      | .      |
|     | PLATEC0.8 | Mean                             |             | 2.6000 | .49501 |
|     |           | 95% Confidence Interval for Mean | Lower Bound | .4702  |        |
|     |           |                                  | Upper Bound | 4.7298 |        |
|     |           | 5% Trimmed Mean                  |             | .      |        |
|     |           | Median                           |             | 2.1100 |        |
|     |           | Variance                         |             | .735   |        |
|     |           | Std. Deviation                   |             | .85738 |        |
|     |           | Minimum                          |             | 2.10   |        |
|     |           | Maximum                          |             | 3.59   |        |
|     |           | Range                            |             | 1.49   |        |
|     |           | Interquartile Range              |             | .      |        |
|     |           | Skewness                         |             | 1.732  | 1.225  |
|     |           | Kurtosis                         |             | .      | .      |
|     | PLATEC1.0 | Mean                             |             | 1.9967 | .27187 |

|           |                                  |             |        |        |
|-----------|----------------------------------|-------------|--------|--------|
| PLATEC1.2 | 95% Confidence Interval for Mean | Lower Bound | .8269  |        |
|           |                                  | Upper Bound | 3.1664 |        |
|           | 5% Trimmed Mean                  |             | .      |        |
|           | Median                           |             | 2.0300 |        |
|           | Variance                         |             | .222   |        |
|           | Std. Deviation                   |             | .47089 |        |
|           | Minimum                          |             | 1.51   |        |
|           | Maximum                          |             | 2.45   |        |
|           | Range                            |             | .94    |        |
|           | Interquartile Range              |             | .      |        |
|           | Skewness                         |             | -.317  | 1.225  |
|           | Kurtosis                         |             | .      | .      |
|           | Mean                             |             | 2.2933 | .32297 |
|           | 95% Confidence Interval for Mean | Lower Bound | .9037  |        |
|           |                                  | Upper Bound | 3.6830 |        |
|           | 5% Trimmed Mean                  |             | .      |        |
|           | Median                           |             | 2.5000 |        |
|           | Variance                         |             | .313   |        |
|           | Std. Deviation                   |             | .55940 |        |
|           | Minimum                          |             | 1.66   |        |
|           | Maximum                          |             | 2.72   |        |
|           | Range                            |             | 1.06   |        |
|           | Interquartile Range              |             | .      |        |
|           | Skewness                         |             | -1.436 | 1.225  |
|           | Kurtosis                         |             | .      | .      |

- a. There are no valid cases for PeO2 when Film\_group1 = .. Statistics cannot be computed for this level.  
b. There are no valid cases for Dwv when Film\_group1 = .. Statistics cannot be computed for this level.  
c. There are no valid cases for EC50 when Film\_group1 = .. Statistics cannot be computed for this level.  
d. There are no valid cases for W.L when Film\_group1 = .. Statistics cannot be computed for this level.

**Table S7:** Overall mean values significant difference hypothesis test using Median Test results for E,  $\sigma_{\text{uis}}$ ,  $\epsilon\%$

Hypothesis Test Summary

|   | Null Hypothesis                                                    | Test                            | Sig.a.b | Decision                    |
|---|--------------------------------------------------------------------|---------------------------------|---------|-----------------------------|
| 1 | The medians of PeO2 are the same across categories of Film_group1. | Independent-Samples Median Test | .043    | Reject the null hypothesis. |
| 2 | The medians of Dwv are the same across categories of Film_group1.  | Independent-Samples Median Test | .112    | Retain the null hypothesis. |
| 3 | The medians of EC50 are the same across categories of Film_group1. | Independent-Samples Median Test | .005    | Reject the null hypothesis. |
| 4 | The medians of W.L are the same across categories of Film_group1.  | Independent-Samples Median Test | .016    | Reject the null hypothesis. |

- a. The significance level is .050.  
b. Asymptotic significance is displayed.

**Table S8:** Pairwise mean values significant difference hypothesis test using Median Test results for P<sub>O2</sub>.

Pairwise Comparisons of Film\_group1

| Sample 1-Sample 2   | Test Statistic | Sig. | Adj. Sig. <sup>a</sup> |
|---------------------|----------------|------|------------------------|
| PLATEC0.6-PLATEC0.4 | .667           | .414 | 1.000                  |
| PLATEC0.6-PLATEC0.2 | .667           | .414 | 1.000                  |
| PLATEC0.6-PLA       | .667           | .414 | 1.000                  |
| PLATEC0.6-PLATEC1.0 | .667           | .414 | 1.000                  |
| PLATEC0.6-PLATEC0.8 | .667           | .414 | 1.000                  |
| PLATEC0.6-PLATEC1.2 | 6.000          | .014 | .300                   |
| PLATEC0.4-PLATEC0.2 | .667           | .414 | 1.000                  |
| PLATEC0.4-PLA       | .667           | .414 | 1.000                  |
| PLATEC0.4-PLATEC1.0 | 6.000          | .014 | .300                   |
| PLATEC0.4-PLATEC0.8 | .667           | .414 | 1.000                  |
| PLATEC0.4-PLATEC1.2 | 6.000          | .014 | .300                   |
| PLATEC0.2-PLA       | .667           | .414 | 1.000                  |
| PLATEC0.2-PLATEC1.0 | .667           | .414 | 1.000                  |
| PLATEC0.2-PLATEC0.8 | .667           | .414 | 1.000                  |
| PLATEC0.2-PLATEC1.2 | 6.000          | .014 | .300                   |
| PLA-PLATEC1.0       | 6.000          | .014 | .300                   |
| PLA-PLATEC0.8       | .667           | .414 | 1.000                  |
| PLA-PLATEC1.2       | 6.000          | .014 | .300                   |
| PLATEC1.0-PLATEC0.8 | .667           | .414 | 1.000                  |
| PLATEC1.0-PLATEC1.2 | 6.000          | .014 | .300                   |
| PLATEC0.8-PLATEC1.2 | 6.000          | .014 | .300                   |

Each row tests the null hypothesis that the Sample 1 and Sample 2 distributions are the same. Asymptotic significances (2-sided tests) are displayed. The significance level is .050.

- a. Significance values have been adjusted by the Bonferroni correction for multiple tests.

**Table S9:** Pairwise mean values significant difference hypothesis test using Median Test results for D<sub>wv</sub>.

Pairwise Comparisons of Film\_group1

| Sample 1-Sample 2   | Test Statistic | Sig.  | Adj. Sig. <sup>a</sup> |
|---------------------|----------------|-------|------------------------|
| PLATEC0.4-PLATEC0.8 | .667           | .414  | 1.000                  |
| PLATEC0.4-PLATEC0.2 | .667           | .414  | 1.000                  |
| PLATEC0.4-PLATEC1.0 | .667           | .414  | 1.000                  |
| PLATEC0.4-PLATEC1.2 | .667           | .414  | 1.000                  |
| PLATEC0.4-PLATEC0.6 | .667           | .414  | 1.000                  |
| PLATEC0.4-PLA       | 6.000          | .014  | .300                   |
| PLATEC0.8-PLATEC0.2 | .667           | .414  | 1.000                  |
| PLATEC0.8-PLATEC1.0 | .667           | .414  | 1.000                  |
| PLATEC0.8-PLATEC1.2 | .667           | .414  | 1.000                  |
| PLATEC0.8-PLATEC0.6 | .667           | .414  | 1.000                  |
| PLATEC0.8-PLA       | 6.000          | .014  | .300                   |
| PLATEC0.2-PLATEC1.0 | .667           | .414  | 1.000                  |
| PLATEC0.2-PLATEC1.2 | .667           | .414  | 1.000                  |
| PLATEC0.2-PLATEC0.6 | .667           | .414  | 1.000                  |
| PLATEC0.2-PLA       | 6.000          | .014  | .300                   |
| PLATEC1.0-PLA       | .667           | .414  | 1.000                  |
| PLATEC1.2-PLA       | .667           | .414  | 1.000                  |
| PLATEC1.0-PLATEC0.6 | .667           | .414  | 1.000                  |
| PLATEC1.2-PLATEC0.6 | .667           | .414  | 1.000                  |
| PLATEC1.0-PLATEC1.2 | .000           | 1.000 | 1.000                  |
| PLATEC0.6-PLA       | .667           | .414  | 1.000                  |

Each row tests the null hypothesis that the Sample 1 and Sample 2 distributions are the same.

Asymptotic significances (2-sided tests) are displayed. The significance level is .050.

a. Significance values have been adjusted by the Bonferroni correction for multiple tests.

**Table S10:** Pairwise mean values significant difference hypothesis test using Median Test results for EC<sub>50</sub>.

Pairwise Comparisons of Film\_group1

| Sample 1-Sample 2   | Test Statistic | Sig. | Adj. Sig. <sup>a</sup> |
|---------------------|----------------|------|------------------------|
| PLATEC1.2-PLATEC1.0 | 6.000          | .014 | .300                   |
| PLATEC1.2-PLATEC0.6 | 6.000          | .014 | .300                   |
| PLATEC1.2-PLATEC0.8 | 6.000          | .014 | .300                   |
| PLATEC1.2-PLATEC0.4 | 6.000          | .014 | .300                   |
| PLATEC1.2-PLATEC0.2 | 6.000          | .014 | .300                   |
| PLATEC1.2-PLA       | 6.000          | .014 | .300                   |
| PLATEC1.0-PLATEC0.6 | 6.000          | .014 | .300                   |
| PLATEC1.0-PLATEC0.8 | .667           | .414 | 1.000                  |
| PLATEC1.0-PLATEC0.4 | 6.000          | .014 | .300                   |
| PLATEC1.0-PLATEC0.2 | 6.000          | .014 | .300                   |
| PLATEC1.0-PLA       | 6.000          | .014 | .300                   |
| PLATEC0.6-PLATEC0.8 | .667           | .414 | 1.000                  |
| PLATEC0.6-PLATEC0.4 | 6.000          | .014 | .300                   |
| PLATEC0.6-PLATEC0.2 | 6.000          | .014 | .300                   |
| PLATEC0.6-PLA       | 6.000          | .014 | .300                   |
| PLATEC0.8-PLATEC0.4 | 6.000          | .014 | .300                   |
| PLATEC0.8-PLATEC0.2 | 6.000          | .014 | .300                   |
| PLATEC0.8-PLA       | 6.000          | .014 | .300                   |
| PLATEC0.4-PLATEC0.2 | 6.000          | .014 | .300                   |
| PLATEC0.4-PLA       | 6.000          | .014 | .300                   |
| PLATEC0.2-PLA       | .667           | .414 | 1.000                  |

Each row tests the null hypothesis that the Sample 1 and Sample 2 distributions are the same.

Asymptotic significances (2-sided tests) are displayed. The significance level is .050.

a. Significance values have been adjusted by the Bonferroni correction for multiple tests.

**Table S11:** Pairwise mean values significant difference hypothesis test using Median Test results for %weight loss.

Pairwise Comparisons of Film\_group1

| Sample 1-Sample 2   | Test Statistic | Sig. | Adj. Sig. <sup>a</sup> |
|---------------------|----------------|------|------------------------|
| PLA-PLATEC0.2       | .667           | .414 | 1.000                  |
| PLA-PLATEC0.4       | 6.000          | .014 | .300                   |
| PLA-PLATEC0.6       | 6.000          | .014 | .300                   |
| PLA-PLATEC1.0       | 6.000          | .014 | .300                   |
| PLA-PLATEC0.8       | 6.000          | .014 | .300                   |
| PLA-PLATEC1.2       | 6.000          | .014 | .300                   |
| PLATEC0.2-PLATEC0.4 | 6.000          | .014 | .300                   |
| PLATEC0.2-PLATEC0.6 | 6.000          | .014 | .300                   |
| PLATEC0.2-PLATEC1.0 | 6.000          | .014 | .300                   |
| PLATEC0.2-PLATEC0.8 | 6.000          | .014 | .300                   |
| PLATEC0.2-PLATEC1.2 | 6.000          | .014 | .300                   |

|                     |       |      |       |
|---------------------|-------|------|-------|
| PLATEC0.4-PLATEC0.6 | 6.000 | .014 | .300  |
| PLATEC0.4-PLATEC1.0 | 6.000 | .014 | .300  |
| PLATEC0.4-PLATEC0.8 | 6.000 | .014 | .300  |
| PLATEC0.4-PLATEC1.2 | 6.000 | .014 | .300  |
| PLATEC0.6-PLATEC1.0 | .667  | .414 | 1.000 |
| PLATEC0.6-PLATEC0.8 | .667  | .414 | 1.000 |
| PLATEC0.6-PLATEC1.2 | .667  | .414 | 1.000 |
| PLATEC1.0-PLATEC0.8 | .667  | .414 | 1.000 |
| PLATEC1.0-PLATEC1.2 | .667  | .414 | 1.000 |
| PLATEC0.8-PLATEC1.2 | .667  | .414 | 1.000 |

Each row tests the null hypothesis that the Sample 1 and Sample 2 distributions are the same.

Asymptotic significances (2-sided tests) are displayed. The significance level is .050.

a. Significance values have been adjusted by the Bonferroni correction for multiple tests.

**Table S12:** Description statistics of cohesion, color, heme-iron, odor, and TBA from DAY 0 to DAY 6

Descriptives<sup>a,b,c,d,e,f,g,h,i,j,k,l,m,n,o,p,q,r,s,t</sup>

|              | Film_group3 |                                  |             | Statistic | Std. Error |
|--------------|-------------|----------------------------------|-------------|-----------|------------|
| cohesionDAY0 | CONTROL     | Mean                             |             | 5.0000    | .00000     |
|              |             | 95% Confidence Interval for Mean | Lower Bound | 5.0000    |            |
|              |             |                                  | Upper Bound | 5.0000    |            |
|              |             | 5% Trimmed Mean                  |             | 5.0000    |            |
|              |             | Median                           |             | 5.0000    |            |
|              |             | Variance                         |             | .000      |            |
|              |             | Std. Deviation                   |             | .00000    |            |
|              |             | Minimum                          |             | 5.00      |            |
|              |             | Maximum                          |             | 5.00      |            |
|              |             | Range                            |             | .00       |            |
|              |             | Interquartile Range              |             | .00       |            |
|              |             | Skewness                         |             | .         | .          |
|              |             | Kurtosis                         |             | .         | .          |
|              | PLA         | Mean                             |             | 5.0000    | .00000     |
|              |             | 95% Confidence Interval for Mean | Lower Bound | 5.0000    |            |
|              |             |                                  | Upper Bound | 5.0000    |            |
|              |             | 5% Trimmed Mean                  |             | 5.0000    |            |
|              |             | Median                           |             | 5.0000    |            |
|              |             | Variance                         |             | .000      |            |
|              |             | Std. Deviation                   |             | .00000    |            |
|              |             | Minimum                          |             | 5.00      |            |
|              |             | Maximum                          |             | 5.00      |            |
|              |             | Range                            |             | .00       |            |
|              |             | Interquartile Range              |             | .00       |            |
|              |             | Skewness                         |             | .         | .          |
|              |             | Kurtosis                         |             | .         | .          |
|              | PLATEC0.6   | Mean                             |             | 5.0000    | .00000     |
|              |             | 95% Confidence Interval for Mean | Lower Bound | 5.0000    |            |
|              |             |                                  | Upper Bound | 5.0000    |            |
|              |             | 5% Trimmed Mean                  |             | 5.0000    |            |
|              |             | Median                           |             | 5.0000    |            |
|              |             | Variance                         |             | .000      |            |
|              |             | Std. Deviation                   |             | .00000    |            |
|              |             | Minimum                          |             | 5.00      |            |
|              |             | Maximum                          |             | 5.00      |            |
|              |             | Range                            |             | .00       |            |
|              |             | Interquartile Range              |             | .00       |            |
|              |             | Skewness                         |             | .         | .          |
|              |             | Kurtosis                         |             | .         | .          |
| cohesionDAY2 | CONTROL     | Mean                             |             | 4.4800    | .16743     |
|              |             | 95% Confidence Interval for Mean | Lower Bound | 3.7596    |            |
|              |             |                                  | Upper Bound | 5.2004    |            |
|              |             | 5% Trimmed Mean                  |             | .         |            |
|              |             | Median                           |             | 4.4800    |            |
|              |             | Variance                         |             | .084      |            |
|              |             | Std. Deviation                   |             | .29000    |            |
|              |             | Minimum                          |             | 4.19      |            |
|              |             | Maximum                          |             | 4.77      |            |
|              |             | Range                            |             | .58       |            |
|              |             | Interquartile Range              |             | .         |            |
|              |             | Skewness                         |             | .000      | 1.225      |
|              |             | Kurtosis                         |             | .         | .          |
|              | PLA         | Mean                             |             | 4.2800    | .23094     |
|              |             | 95% Confidence Interval for Mean | Lower Bound | 3.2863    |            |
|              |             |                                  |             |           |            |
|              |             |                                  |             |           |            |

|              |                                  |                                  |             |        |        |
|--------------|----------------------------------|----------------------------------|-------------|--------|--------|
|              |                                  | Upper Bound                      |             | 5.2737 |        |
|              |                                  | 5% Trimmed Mean                  |             | .      |        |
|              |                                  | Median                           |             | 4.2800 |        |
|              |                                  | Variance                         |             | .160   |        |
|              |                                  | Std. Deviation                   |             | .40000 |        |
|              |                                  | Minimum                          |             | 3.88   |        |
|              |                                  | Maximum                          |             | 4.68   |        |
|              |                                  | Range                            |             | .80    |        |
|              |                                  | Interquartile Range              |             | .      |        |
|              |                                  | Skewness                         |             | .000   | 1.225  |
|              |                                  | Kurtosis                         |             | .      | .      |
|              |                                  | PLATEC0.6                        | Mean        |        | 4.4600 |
|              | 95% Confidence Interval for Mean |                                  | Lower Bound | 3.7893 |        |
|              |                                  |                                  | Upper Bound | 5.1307 |        |
|              | 5% Trimmed Mean                  |                                  | .           |        |        |
|              | Median                           |                                  | 4.4600      |        |        |
|              | Variance                         |                                  | .073        |        |        |
|              | Std. Deviation                   |                                  | .27000      |        |        |
|              | Minimum                          |                                  | 4.19        |        |        |
|              | Maximum                          |                                  | 4.73        |        |        |
|              | Range                            |                                  | .54         |        |        |
|              | Interquartile Range              |                                  | .           |        |        |
|              | Skewness                         |                                  | .000        | 1.225  |        |
|              | Kurtosis                         |                                  | .           | .      |        |
| cohesionDAY4 | CONTROL                          | Mean                             |             | 3.8000 | .11547 |
|              |                                  | 95% Confidence Interval for Mean | Lower Bound | 3.3032 |        |
|              |                                  |                                  | Upper Bound | 4.2968 |        |
|              |                                  | 5% Trimmed Mean                  |             | .      |        |
|              |                                  | Median                           |             | 3.8000 |        |
|              |                                  | Variance                         |             | .040   |        |
|              |                                  | Std. Deviation                   |             | .20000 |        |
|              |                                  | Minimum                          |             | 3.60   |        |
|              |                                  | Maximum                          |             | 4.00   |        |
|              |                                  | Range                            |             | .40    |        |
|              |                                  | Interquartile Range              |             | .      |        |
|              |                                  | Skewness                         |             | .000   | 1.225  |
|              | Kurtosis                         |                                  | .           | .      |        |
|              | PLA                              | Mean                             |             | 4.1000 | .14434 |
|              |                                  | 95% Confidence Interval for Mean | Lower Bound | 3.4790 |        |
|              |                                  |                                  | Upper Bound | 4.7210 |        |
|              |                                  | 5% Trimmed Mean                  |             | .      |        |
|              |                                  | Median                           |             | 4.1000 |        |
|              |                                  | Variance                         |             | .062   |        |
|              |                                  | Std. Deviation                   |             | .25000 |        |
|              |                                  | Minimum                          |             | 3.85   |        |
|              |                                  | Maximum                          |             | 4.35   |        |
|              |                                  | Range                            |             | .50    |        |
|              |                                  | Interquartile Range              |             | .      |        |
| Skewness     |                                  | .000                             | 1.225       |        |        |
| Kurtosis     |                                  | .                                | .           |        |        |
| PLATEC0.6    | Mean                             |                                  | 4.3200      | .06351 |        |
|              | 95% Confidence Interval for Mean | Lower Bound                      | 4.0467      |        |        |
|              |                                  | Upper Bound                      | 4.5933      |        |        |
|              | 5% Trimmed Mean                  |                                  | .           |        |        |
|              | Median                           |                                  | 4.3200      |        |        |
|              | Variance                         |                                  | .012        |        |        |
|              | Std. Deviation                   |                                  | .11000      |        |        |
|              | Minimum                          |                                  | 4.21        |        |        |
|              | Maximum                          |                                  | 4.43        |        |        |
|              | Range                            |                                  | .22         |        |        |
|              | Interquartile Range              |                                  | .           |        |        |
|              | Skewness                         |                                  | .000        | 1.225  |        |
| Kurtosis     |                                  | .                                | .           |        |        |
| cohesionDAY6 | CONTROL                          | Mean                             |             | 2.8400 | .06351 |
|              |                                  | 95% Confidence Interval for Mean | Lower Bound | 2.5667 |        |
|              |                                  |                                  | Upper Bound | 3.1133 |        |
|              |                                  | 5% Trimmed Mean                  |             | .      |        |
|              |                                  | Median                           |             | 2.8400 |        |
|              |                                  | Variance                         |             | .012   |        |
|              |                                  | Std. Deviation                   |             | .11000 |        |
|              |                                  | Minimum                          |             | 2.73   |        |



|           |           |                                  |             |        |        |
|-----------|-----------|----------------------------------|-------------|--------|--------|
| colorDAY0 | PLA       | Maximum                          |             | 2.95   |        |
|           |           | Range                            |             | .22    |        |
|           |           | Interquartile Range              |             | .      |        |
|           |           | Skewness                         |             | .000   | 1.225  |
|           |           | Kurtosis                         |             | .      | .      |
|           |           | Mean                             |             | 3.3200 | .16166 |
|           |           | 95% Confidence Interval for Mean | Lower Bound | 2.6244 |        |
|           |           |                                  | Upper Bound | 4.0156 |        |
|           |           | 5% Trimmed Mean                  |             | .      |        |
|           |           | Median                           |             | 3.3200 |        |
|           |           | Variance                         |             | .078   |        |
|           |           | Std. Deviation                   |             | .28000 |        |
|           |           | Minimum                          |             | 3.04   |        |
|           |           | Maximum                          |             | 3.60   |        |
|           |           | Range                            |             | .56    |        |
|           | PLATEC0.6 | Interquartile Range              |             | .      |        |
|           |           | Skewness                         |             | .000   | 1.225  |
|           |           | Kurtosis                         |             | .      | .      |
|           |           | Mean                             |             | 3.9400 | .10392 |
|           |           | 95% Confidence Interval for Mean | Lower Bound | 3.4929 |        |
|           |           |                                  | Upper Bound | 4.3871 |        |
|           |           | 5% Trimmed Mean                  |             | .      |        |
|           |           | Median                           |             | 3.9400 |        |
|           |           | Variance                         |             | .032   |        |
|           |           | Std. Deviation                   |             | .18000 |        |
|           |           | Minimum                          |             | 3.76   |        |
|           |           | Maximum                          |             | 4.12   |        |
|           |           | Range                            |             | .36    |        |
|           |           | Interquartile Range              |             | .      |        |
|           |           | Skewness                         |             | .000   | 1.225  |
|           |           | Kurtosis                         |             | .      | .      |
| colorDAY2 | CONTROL   | Mean                             |             | 5.0000 | .00000 |
|           |           | 95% Confidence Interval for Mean | Lower Bound | 5.0000 |        |
|           |           |                                  | Upper Bound | 5.0000 |        |
|           |           | 5% Trimmed Mean                  |             | 5.0000 |        |
|           |           | Median                           |             | 5.0000 |        |
|           |           | Variance                         |             | .000   |        |
|           |           | Std. Deviation                   |             | .00000 |        |
|           |           | Minimum                          |             | 5.00   |        |
|           |           | Maximum                          |             | 5.00   |        |
|           |           | Range                            |             | .00    |        |
|           |           | Interquartile Range              |             | .00    |        |
|           |           | Skewness                         |             | .      | .      |
|           |           | Kurtosis                         |             | .      | .      |
|           | PLA       | Mean                             |             | 5.0000 | .00000 |
|           |           | 95% Confidence Interval for Mean | Lower Bound | 5.0000 |        |
|           |           |                                  | Upper Bound | 5.0000 |        |
|           |           | 5% Trimmed Mean                  |             | 5.0000 |        |
|           |           | Median                           |             | 5.0000 |        |
|           |           | Variance                         |             | .000   |        |
|           |           | Std. Deviation                   |             | .00000 |        |
|           |           | Minimum                          |             | 5.00   |        |
|           |           | Maximum                          |             | 5.00   |        |
|           |           | Range                            |             | .00    |        |
|           |           | Interquartile Range              |             | .00    |        |
|           |           | Skewness                         |             | .      | .      |
|           |           | Kurtosis                         |             | .      | .      |
|           | PLATEC0.6 | Mean                             |             | 5.0000 | .00000 |
|           |           | 95% Confidence Interval for Mean | Lower Bound | 5.0000 |        |
|           |           |                                  | Upper Bound | 5.0000 |        |
|           |           | 5% Trimmed Mean                  |             | 5.0000 |        |
|           |           | Median                           |             | 5.0000 |        |
|           |           | Variance                         |             | .000   |        |
|           |           | Std. Deviation                   |             | .00000 |        |
|           |           | Minimum                          |             | 5.00   |        |
|           |           | Maximum                          |             | 5.00   |        |
|           |           | Range                            |             | .00    |        |
|           |           | Interquartile Range              |             | .00    |        |
|           |           | Skewness                         |             | .      | .      |
|           |           | Kurtosis                         |             | .      | .      |
|           | CONTROL   | Mean                             |             | 4.3000 | .11547 |

|                                  |           |             |                                  |                                  |             |             |        |        |
|----------------------------------|-----------|-------------|----------------------------------|----------------------------------|-------------|-------------|--------|--------|
|                                  |           |             | 95% Confidence Interval for Mean |                                  | Lower Bound | 3.8032      |        |        |
|                                  |           |             |                                  |                                  | Upper Bound | 4.7968      |        |        |
|                                  |           |             | 5% Trimmed Mean                  |                                  |             | .           |        |        |
|                                  |           |             | Median                           |                                  |             | 4.3000      |        |        |
|                                  |           |             | Variance                         |                                  |             | .040        |        |        |
|                                  |           |             | Std. Deviation                   |                                  |             | .20000      |        |        |
|                                  |           |             | Minimum                          |                                  |             | 4.10        |        |        |
|                                  |           |             | Maximum                          |                                  |             | 4.50        |        |        |
|                                  |           |             | Range                            |                                  |             | .40         |        |        |
|                                  |           |             | Interquartile Range              |                                  |             | .           |        |        |
|                                  |           |             | Skewness                         |                                  |             | .000        | 1.225  |        |
|                                  |           |             | Kurtosis                         |                                  |             | .           | .      |        |
|                                  | PLA       |             |                                  | Mean                             |             |             | 4.5000 | .05774 |
|                                  |           |             |                                  | 95% Confidence Interval for Mean |             | Lower Bound | 4.2516 |        |
|                                  |           |             |                                  |                                  |             | Upper Bound | 4.7484 |        |
|                                  |           |             |                                  | 5% Trimmed Mean                  |             |             | .      |        |
|                                  |           |             |                                  | Median                           |             |             | 4.5000 |        |
|                                  |           |             |                                  | Variance                         |             |             | .010   |        |
|                                  |           |             |                                  | Std. Deviation                   |             |             | .10000 |        |
|                                  |           |             |                                  | Minimum                          |             |             | 4.40   |        |
|                                  |           |             |                                  | Maximum                          |             |             | 4.60   |        |
|                                  |           |             |                                  | Range                            |             |             | .20    |        |
|                                  |           |             |                                  | Interquartile Range              |             |             | .      |        |
|                                  |           |             |                                  | Skewness                         |             |             | .000   | 1.225  |
|                                  | PLATEC0.6 |             |                                  | Kurtosis                         |             |             | .      | .      |
|                                  |           |             |                                  | Mean                             |             |             | 4.6000 | .02887 |
| 95% Confidence Interval for Mean |           |             |                                  | Lower Bound                      | 4.4758      |             |        |        |
|                                  |           |             |                                  | Upper Bound                      | 4.7242      |             |        |        |
| 5% Trimmed Mean                  |           |             |                                  |                                  | .           |             |        |        |
| Median                           |           |             |                                  |                                  | 4.6000      |             |        |        |
| Variance                         |           |             |                                  |                                  | .003        |             |        |        |
| Std. Deviation                   |           |             |                                  |                                  | .05000      |             |        |        |
| Minimum                          |           |             |                                  |                                  | 4.55        |             |        |        |
| Maximum                          |           |             |                                  |                                  | 4.65        |             |        |        |
| Range                            |           |             |                                  |                                  | .10         |             |        |        |
| Interquartile Range              |           |             |                                  |                                  | .           |             |        |        |
| colorDAY4                        | CONTROL   |             | Skewness                         |                                  |             | .000        | 1.225  |        |
|                                  |           |             | Kurtosis                         |                                  |             | .           | .      |        |
|                                  |           |             | Mean                             |                                  |             | 3.9800      | .16743 |        |
|                                  |           |             | 95% Confidence Interval for Mean |                                  | Lower Bound | 3.2596      |        |        |
|                                  |           |             |                                  |                                  | Upper Bound | 4.7004      |        |        |
|                                  |           |             | 5% Trimmed Mean                  |                                  |             | .           |        |        |
|                                  |           |             | Median                           |                                  |             | 3.9800      |        |        |
|                                  |           |             | Variance                         |                                  |             | .084        |        |        |
|                                  |           |             | Std. Deviation                   |                                  |             | .29000      |        |        |
|                                  |           |             | Minimum                          |                                  |             | 3.69        |        |        |
|                                  |           |             | Maximum                          |                                  |             | 4.27        |        |        |
|                                  |           |             | Range                            |                                  |             | .58         |        |        |
|                                  | PLA       |             |                                  | Interquartile Range              |             |             | .      |        |
|                                  |           |             |                                  | Skewness                         |             |             | .000   | 1.225  |
|                                  |           |             |                                  | Kurtosis                         |             |             | .      | .      |
|                                  |           |             |                                  | Mean                             |             |             | 4.1200 | .19053 |
|                                  |           |             |                                  | 95% Confidence Interval for Mean |             | Lower Bound | 3.3002 |        |
|                                  |           |             |                                  |                                  |             | Upper Bound | 4.9398 |        |
|                                  |           |             |                                  | 5% Trimmed Mean                  |             |             | .      |        |
|                                  |           |             |                                  | Median                           |             |             | 4.1200 |        |
|                                  |           |             |                                  | Variance                         |             |             | .109   |        |
|                                  |           |             |                                  | Std. Deviation                   |             |             | .33000 |        |
|                                  |           |             |                                  | Minimum                          |             |             | 3.79   |        |
|                                  |           |             |                                  | Maximum                          |             |             | 4.45   |        |
|                                  | PLATEC0.6 |             |                                  | Range                            |             |             | .66    |        |
|                                  |           |             |                                  | Interquartile Range              |             |             | .      |        |
| Skewness                         |           |             |                                  |                                  | .000        | 1.225       |        |        |
| Kurtosis                         |           |             |                                  |                                  | .           | .           |        |        |
| Mean                             |           |             |                                  |                                  | 4.3500      | .15588      |        |        |
| 95% Confidence Interval for Mean |           |             |                                  | Lower Bound                      | 3.6793      |             |        |        |
|                                  |           | Upper Bound | 5.0207                           |                                  |             |             |        |        |
| 5% Trimmed Mean                  |           |             | .                                |                                  |             |             |        |        |
| Median                           |           |             | 4.3500                           |                                  |             |             |        |        |
| Variance                         |           |             | .073                             |                                  |             |             |        |        |
| Std. Deviation                   |           |             | .27000                           |                                  |             |             |        |        |

|           |           |                                  |             |        |        |
|-----------|-----------|----------------------------------|-------------|--------|--------|
| colorDAY6 | CONTROL   | Minimum                          |             | 4.08   |        |
|           |           | Maximum                          |             | 4.62   |        |
|           |           | Range                            |             | .54    |        |
|           |           | Interquartile Range              |             | .      |        |
|           |           | Skewness                         |             | .000   | 1.225  |
|           |           | Kurtosis                         |             | .      | .      |
|           |           | Mean                             |             | 2.8500 | .08660 |
|           |           | 95% Confidence Interval for Mean | Lower Bound | 2.4774 |        |
|           |           |                                  | Upper Bound | 3.2226 |        |
|           |           | 5% Trimmed Mean                  |             | .      |        |
|           |           | Median                           |             | 2.8500 |        |
|           |           | Variance                         |             | .022   |        |
|           |           | Std. Deviation                   |             | .15000 |        |
|           |           | Minimum                          |             | 2.70   |        |
|           |           | Maximum                          |             | 3.00   |        |
|           | PLA       | Range                            |             | .30    |        |
|           |           | Interquartile Range              |             | .      |        |
|           |           | Skewness                         |             | .000   | 1.225  |
|           |           | Kurtosis                         |             | .      | .      |
|           |           | Mean                             |             | 3.5000 | .09238 |
|           |           | 95% Confidence Interval for Mean | Lower Bound | 3.1025 |        |
|           |           |                                  | Upper Bound | 3.8975 |        |
|           |           | 5% Trimmed Mean                  |             | .      |        |
|           |           | Median                           |             | 3.5000 |        |
|           |           | Variance                         |             | .026   |        |
|           |           | Std. Deviation                   |             | .16000 |        |
|           |           | Minimum                          |             | 3.34   |        |
|           |           | Maximum                          |             | 3.66   |        |
|           |           | Range                            |             | .32    |        |
|           |           | Interquartile Range              |             | .      |        |
|           |           | Skewness                         |             | .000   | 1.225  |
|           |           | Kurtosis                         |             | .      | .      |
|           | PLATEC0.6 | Mean                             |             | 4.0200 | .10970 |
|           |           | 95% Confidence Interval for Mean | Lower Bound | 3.5480 |        |
|           |           |                                  | Upper Bound | 4.4920 |        |
|           |           | 5% Trimmed Mean                  |             | .      |        |
|           |           | Median                           |             | 4.0200 |        |
|           |           | Variance                         |             | .036   |        |
|           |           | Std. Deviation                   |             | .19000 |        |
|           |           | Minimum                          |             | 3.83   |        |
|           |           | Maximum                          |             | 4.21   |        |
|           |           | Range                            |             | .38    |        |
|           |           | Interquartile Range              |             | .      |        |
|           |           | Skewness                         |             | .000   | 1.225  |
|           |           | Kurtosis                         |             | .      | .      |
| feDAY0    | CONTROL   | Mean                             |             | 7.6569 | .07208 |
|           |           | 95% Confidence Interval for Mean | Lower Bound | 7.3468 |        |
|           |           |                                  | Upper Bound | 7.9671 |        |
|           |           | 5% Trimmed Mean                  |             | .      |        |
|           |           | Median                           |             | 7.6170 |        |
|           |           | Variance                         |             | .016   |        |
|           |           | Std. Deviation                   |             | .12485 |        |
|           |           | Minimum                          |             | 7.56   |        |
|           |           | Maximum                          |             | 7.80   |        |
|           |           | Range                            |             | .24    |        |
|           |           | Interquartile Range              |             | .      |        |
|           |           | Skewness                         |             | 1.293  | 1.225  |
|           |           | Kurtosis                         |             | .      | .      |
|           | PLA       | Mean                             |             | 7.6569 | .07208 |
|           |           | 95% Confidence Interval for Mean | Lower Bound | 7.3468 |        |
|           |           |                                  | Upper Bound | 7.9671 |        |
|           |           | 5% Trimmed Mean                  |             | .      |        |
|           |           | Median                           |             | 7.6170 |        |
|           |           | Variance                         |             | .016   |        |
|           |           | Std. Deviation                   |             | .12485 |        |
|           |           | Minimum                          |             | 7.56   |        |
|           |           | Maximum                          |             | 7.80   |        |
|           |           | Range                            |             | .24    |        |
|           |           | Interquartile Range              |             | .      |        |
|           |           | Skewness                         |             | 1.293  | 1.225  |
|           |           | Kurtosis                         |             | .      | .      |

|        |           |                                  |             |        |        |
|--------|-----------|----------------------------------|-------------|--------|--------|
| feDAY2 | PLATEC0.6 | Mean                             |             | 7.6569 | .07208 |
|        |           | 95% Confidence Interval for Mean | Lower Bound | 7.3468 |        |
|        |           |                                  | Upper Bound | 7.9671 |        |
|        |           | 5% Trimmed Mean                  |             | .      |        |
|        |           | Median                           |             | 7.6170 |        |
|        |           | Variance                         |             | .016   |        |
|        |           | Std. Deviation                   |             | .12485 |        |
|        |           | Minimum                          |             | 7.56   |        |
|        |           | Maximum                          |             | 7.80   |        |
|        |           | Range                            |             | .24    |        |
|        |           | Interquartile Range              |             | .      |        |
|        |           | Skewness                         |             | 1.293  | 1.225  |
|        |           | Kurtosis                         |             | .      | .      |
|        | CONTROL   | Mean                             |             | 6.2575 | .20872 |
|        |           | 95% Confidence Interval for Mean | Lower Bound | 5.3594 |        |
|        |           |                                  | Upper Bound | 7.1556 |        |
|        |           | 5% Trimmed Mean                  |             | .      |        |
|        |           | Median                           |             | 6.2975 |        |
|        |           | Variance                         |             | .131   |        |
|        |           | Std. Deviation                   |             | .36152 |        |
|        |           | Minimum                          |             | 5.88   |        |
|        |           | Maximum                          |             | 6.60   |        |
|        |           | Range                            |             | .72    |        |
|        |           | Interquartile Range              |             | .      |        |
|        |           | Skewness                         |             | -.492  | 1.225  |
|        |           | Kurtosis                         |             | .      | .      |
|        | PLA       | Mean                             |             | 6.7373 | .12161 |
|        |           | 95% Confidence Interval for Mean | Lower Bound | 6.2141 |        |
|        |           |                                  | Upper Bound | 7.2605 |        |
|        |           | 5% Trimmed Mean                  |             | .      |        |
|        |           | Median                           |             | 6.7173 |        |
|        |           | Variance                         |             | .044   |        |
|        |           | Std. Deviation                   |             | .21063 |        |
|        |           | Minimum                          |             | 6.54   |        |
|        |           | Maximum                          |             | 6.96   |        |
|        |           | Range                            |             | .42    |        |
|        |           | Interquartile Range              |             | .      |        |
|        |           | Skewness                         |             | .423   | 1.225  |
|        |           | Kurtosis                         |             | .      | .      |
| feDAY4 | PLATEC0.6 | Mean                             |             | 7.1172 | .07208 |
|        |           | 95% Confidence Interval for Mean | Lower Bound | 6.8070 |        |
|        |           |                                  | Upper Bound | 7.4273 |        |
|        |           | 5% Trimmed Mean                  |             | .      |        |
|        |           | Median                           |             | 7.0772 |        |
|        |           | Variance                         |             | .016   |        |
|        |           | Std. Deviation                   |             | .12485 |        |
|        |           | Minimum                          |             | 7.02   |        |
|        |           | Maximum                          |             | 7.26   |        |
|        |           | Range                            |             | .24    |        |
|        |           | Interquartile Range              |             | .      |        |
|        |           | Skewness                         |             | 1.293  | 1.225  |
|        |           | Kurtosis                         |             | .      | .      |
|        | CONTROL   | Mean                             |             | 5.5178 | .10388 |
|        |           | 95% Confidence Interval for Mean | Lower Bound | 5.0708 |        |
|        |           |                                  | Upper Bound | 5.9648 |        |
|        |           | 5% Trimmed Mean                  |             | .      |        |
|        |           | Median                           |             | 5.5178 |        |
|        |           | Variance                         |             | .032   |        |
|        |           | Std. Deviation                   |             | .17993 |        |
|        |           | Minimum                          |             | 5.34   |        |
|        |           | Maximum                          |             | 5.70   |        |
|        |           | Range                            |             | .36    |        |
|        |           | Interquartile Range              |             | .      |        |
|        |           | Skewness                         |             | .000   | 1.225  |
|        |           | Kurtosis                         |             | .      | .      |
|        | PLA       | Mean                             |             | 5.7177 | .07208 |
|        |           | 95% Confidence Interval for Mean | Lower Bound | 5.4076 |        |
|        |           |                                  | Upper Bound | 6.0279 |        |
|        |           | 5% Trimmed Mean                  |             | .      |        |
|        |           | Median                           |             | 5.7577 |        |
|        |           | Variance                         |             | .016   |        |

|          |           |  |  |                                  |             |        |
|----------|-----------|--|--|----------------------------------|-------------|--------|
|          |           |  |  | Std. Deviation                   | .12485      |        |
|          |           |  |  | Minimum                          | 5.58        |        |
|          |           |  |  | Maximum                          | 5.82        |        |
|          |           |  |  | Range                            | .24         |        |
|          |           |  |  | Interquartile Range              | .           |        |
|          |           |  |  | Skewness                         | -1.293      | 1.225  |
|          |           |  |  | Kurtosis                         | .           | .      |
|          | PLATEC0.6 |  |  | Mean                             | 6.0976      | .12161 |
|          |           |  |  | 95% Confidence Interval for Mean | Lower Bound | 5.5743 |
|          |           |  |  |                                  | Upper Bound | 6.6208 |
|          |           |  |  | 5% Trimmed Mean                  | .           |        |
|          |           |  |  | Median                           | 6.1176      |        |
|          |           |  |  | Variance                         | .044        |        |
|          |           |  |  | Std. Deviation                   | .21063      |        |
|          |           |  |  | Minimum                          | 5.88        |        |
|          |           |  |  | Maximum                          | 6.30        |        |
|          |           |  |  | Range                            | .42         |        |
|          |           |  |  | Interquartile Range              | .           |        |
|          |           |  |  | Skewness                         | -.423       | 1.225  |
|          |           |  |  | Kurtosis                         | .           | .      |
|          |           |  |  | Mean                             | 4.6981      | .19071 |
| feDAY6   | CONTROL   |  |  | 95% Confidence Interval for Mean | Lower Bound | 3.8776 |
|          |           |  |  |                                  | Upper Bound | 5.5187 |
|          |           |  |  | 5% Trimmed Mean                  | .           |        |
|          |           |  |  | Median                           | 4.6781      |        |
|          |           |  |  | Variance                         | .109        |        |
|          |           |  |  | Std. Deviation                   | .33032      |        |
|          |           |  |  | Minimum                          | 4.38        |        |
|          |           |  |  | Maximum                          | 5.04        |        |
|          |           |  |  | Range                            | .66         |        |
|          |           |  |  | Interquartile Range              | .           |        |
|          |           |  |  | Skewness                         | .271        | 1.225  |
|          |           |  |  | Kurtosis                         | .           | .      |
|          | PLA       |  |  | Mean                             | 4.6381      | .11131 |
|          |           |  |  | 95% Confidence Interval for Mean | Lower Bound | 4.1592 |
|          |           |  |  |                                  | Upper Bound | 5.1171 |
|          |           |  |  | 5% Trimmed Mean                  | .           |        |
|          |           |  |  | Median                           | 4.5582      |        |
|          |           |  |  | Variance                         | .037        |        |
|          |           |  |  | Std. Deviation                   | .19280      |        |
|          |           |  |  | Minimum                          | 4.50        |        |
|          |           |  |  | Maximum                          | 4.86        |        |
|          |           |  |  | Range                            | .36         |        |
|          |           |  |  | Interquartile Range              | .           |        |
|          |           |  |  | Skewness                         | 1.545       | 1.225  |
|          |           |  |  | Kurtosis                         | .           | .      |
|          | PLATEC0.6 |  |  | Mean                             | 5.1979      | .15614 |
|          |           |  |  | 95% Confidence Interval for Mean | Lower Bound | 4.5261 |
|          |           |  |  |                                  | Upper Bound | 5.8697 |
|          |           |  |  | 5% Trimmed Mean                  | .           |        |
|          |           |  |  | Median                           | 5.2179      |        |
|          |           |  |  | Variance                         | .073        |        |
|          |           |  |  | Std. Deviation                   | .27045      |        |
|          |           |  |  | Minimum                          | 4.92        |        |
|          |           |  |  | Maximum                          | 5.46        |        |
|          |           |  |  | Range                            | .54         |        |
|          |           |  |  | Interquartile Range              | .           |        |
|          |           |  |  | Skewness                         | -.331       | 1.225  |
|          |           |  |  | Kurtosis                         | .           | .      |
| odorDAY0 | CONTROL   |  |  | Mean                             | 5.0000      | .00000 |
|          |           |  |  | 95% Confidence Interval for Mean | Lower Bound | 5.0000 |
|          |           |  |  |                                  | Upper Bound | 5.0000 |
|          |           |  |  | 5% Trimmed Mean                  | 5.0000      |        |
|          |           |  |  | Median                           | 5.0000      |        |
|          |           |  |  | Variance                         | .000        |        |
|          |           |  |  | Std. Deviation                   | .00000      |        |
|          |           |  |  | Minimum                          | 5.00        |        |
|          |           |  |  | Maximum                          | 5.00        |        |
|          |           |  |  | Range                            | .00         |        |
|          |           |  |  | Interquartile Range              | .00         |        |
|          |           |  |  | Skewness                         | .           | .      |

|          |           |                                  |             |        |        |
|----------|-----------|----------------------------------|-------------|--------|--------|
|          | PLA       | Kurtosis                         |             | .      | .      |
|          |           | Mean                             |             | 5.0000 | .00000 |
|          |           | 95% Confidence Interval for Mean | Lower Bound | 5.0000 |        |
|          |           |                                  | Upper Bound | 5.0000 |        |
|          |           | 5% Trimmed Mean                  |             | 5.0000 |        |
|          |           | Median                           |             | 5.0000 |        |
|          |           | Variance                         |             | .000   |        |
|          |           | Std. Deviation                   |             | .00000 |        |
|          |           | Minimum                          |             | 5.00   |        |
|          |           | Maximum                          |             | 5.00   |        |
|          |           | Range                            |             | .00    |        |
|          |           | Interquartile Range              |             | .00    |        |
|          |           | Skewness                         |             | .      | .      |
|          |           | Kurtosis                         |             | .      | .      |
|          | PLATEC0.6 | Mean                             |             | 5.0000 | .00000 |
|          |           | 95% Confidence Interval for Mean | Lower Bound | 5.0000 |        |
|          |           |                                  | Upper Bound | 5.0000 |        |
|          |           | 5% Trimmed Mean                  |             | 5.0000 |        |
|          |           | Median                           |             | 5.0000 |        |
|          |           | Variance                         |             | .000   |        |
|          |           | Std. Deviation                   |             | .00000 |        |
|          |           | Minimum                          |             | 5.00   |        |
|          |           | Maximum                          |             | 5.00   |        |
|          |           | Range                            |             | .00    |        |
|          |           | Interquartile Range              |             | .00    |        |
|          |           | Skewness                         |             | .      | .      |
|          |           | Kurtosis                         |             | .      | .      |
| odorDAY2 | CONTROL   | Mean                             |             | 4.3200 | .13856 |
|          |           | 95% Confidence Interval for Mean | Lower Bound | 3.7238 |        |
|          |           |                                  | Upper Bound | 4.9162 |        |
|          |           | 5% Trimmed Mean                  |             | .      |        |
|          |           | Median                           |             | 4.3200 |        |
|          |           | Variance                         |             | .058   |        |
|          |           | Std. Deviation                   |             | .24000 |        |
|          |           | Minimum                          |             | 4.08   |        |
|          |           | Maximum                          |             | 4.56   |        |
|          |           | Range                            |             | .48    |        |
|          |           | Interquartile Range              |             | .      |        |
|          |           | Skewness                         |             | .000   | 1.225  |
|          |           | Kurtosis                         |             | .      | .      |
|          | PLA       | Mean                             |             | 4.5500 | .08083 |
|          |           | 95% Confidence Interval for Mean | Lower Bound | 4.2022 |        |
|          |           |                                  | Upper Bound | 4.8978 |        |
|          |           | 5% Trimmed Mean                  |             | .      |        |
|          |           | Median                           |             | 4.5500 |        |
|          |           | Variance                         |             | .020   |        |
|          |           | Std. Deviation                   |             | .14000 |        |
|          |           | Minimum                          |             | 4.41   |        |
|          |           | Maximum                          |             | 4.69   |        |
|          |           | Range                            |             | .28    |        |
|          |           | Interquartile Range              |             | .      |        |
|          |           | Skewness                         |             | .000   | 1.225  |
|          |           | Kurtosis                         |             | .      | .      |
|          | PLATEC0.6 | Mean                             |             | 4.7100 | .08083 |
|          |           | 95% Confidence Interval for Mean | Lower Bound | 4.3622 |        |
|          |           |                                  | Upper Bound | 5.0578 |        |
|          |           | 5% Trimmed Mean                  |             | .      |        |
|          |           | Median                           |             | 4.7100 |        |
|          |           | Variance                         |             | .020   |        |
|          |           | Std. Deviation                   |             | .14000 |        |
|          |           | Minimum                          |             | 4.57   |        |
|          |           | Maximum                          |             | 4.85   |        |
|          |           | Range                            |             | .28    |        |
|          |           | Interquartile Range              |             | .      |        |
|          |           | Skewness                         |             | .000   | 1.225  |
|          |           | Kurtosis                         |             | .      | .      |
| odorDAY4 | CONTROL   | Mean                             |             | 3.9400 | .13279 |
|          |           | 95% Confidence Interval for Mean | Lower Bound | 3.3686 |        |
|          |           |                                  | Upper Bound | 4.5114 |        |
|          |           | 5% Trimmed Mean                  |             | .      |        |
|          |           | Median                           |             | 3.9400 |        |

|          |           |                                  |             |        |
|----------|-----------|----------------------------------|-------------|--------|
|          |           | Variance                         | .053        |        |
|          |           | Std. Deviation                   | .23000      |        |
|          |           | Minimum                          | 3.71        |        |
|          |           | Maximum                          | 4.17        |        |
|          |           | Range                            | .46         |        |
|          |           | Interquartile Range              | .           |        |
|          | PLA       | Skewness                         | .000        | 1.225  |
|          |           | Kurtosis                         | .           | .      |
|          |           | Mean                             | 4.2200      | .15588 |
|          |           | 95% Confidence Interval for Mean | Lower Bound | 3.5493 |
|          |           |                                  | Upper Bound | 4.8907 |
|          |           | 5% Trimmed Mean                  | .           |        |
|          |           | Median                           | 4.2200      |        |
|          |           | Variance                         | .073        |        |
|          |           | Std. Deviation                   | .27000      |        |
|          |           | Minimum                          | 3.95        |        |
|          | PLATEC0.6 | Maximum                          | 4.49        |        |
|          |           | Range                            | .54         |        |
|          |           | Interquartile Range              | .           |        |
|          |           | Skewness                         | .000        | 1.225  |
|          |           | Kurtosis                         | .           | .      |
|          |           | Mean                             | 4.5000      | .08660 |
|          |           | 95% Confidence Interval for Mean | Lower Bound | 4.1274 |
|          |           |                                  | Upper Bound | 4.8726 |
|          |           | 5% Trimmed Mean                  | .           |        |
|          |           | Median                           | 4.5000      |        |
|          | PLATEC0.6 | Variance                         | .023        |        |
|          |           | Std. Deviation                   | .15000      |        |
|          |           | Minimum                          | 4.35        |        |
|          |           | Maximum                          | 4.65        |        |
|          |           | Range                            | .30         |        |
|          |           | Interquartile Range              | .           |        |
|          |           | Skewness                         | .000        | 1.225  |
|          |           | Kurtosis                         | .           | .      |
| odorDAY6 | CONTROL   | Mean                             | 3.5000      | .05774 |
|          |           | 95% Confidence Interval for Mean | Lower Bound | 3.2516 |
|          |           |                                  | Upper Bound | 3.7484 |
|          |           | 5% Trimmed Mean                  | .           |        |
|          |           | Median                           | 3.5000      |        |
|          |           | Variance                         | .010        |        |
|          |           | Std. Deviation                   | .10000      |        |
|          |           | Minimum                          | 3.40        |        |
|          |           | Maximum                          | 3.60        |        |
|          |           | Range                            | .20         |        |
|          | PLA       | Interquartile Range              | .           |        |
|          |           | Skewness                         | .000        | 1.225  |
|          |           | Kurtosis                         | .           | .      |
|          |           | Mean                             | 3.6000      | .11547 |
|          |           | 95% Confidence Interval for Mean | Lower Bound | 3.1032 |
|          |           |                                  | Upper Bound | 4.0968 |
|          |           | 5% Trimmed Mean                  | .           |        |
|          |           | Median                           | 3.6000      |        |
|          |           | Variance                         | .040        |        |
|          |           | Std. Deviation                   | .20000      |        |
|          | PLATEC0.6 | Minimum                          | 3.40        |        |
|          |           | Maximum                          | 3.80        |        |
|          |           | Range                            | .40         |        |
|          |           | Interquartile Range              | .           |        |
|          |           | Skewness                         | .000        | 1.225  |
|          |           | Kurtosis                         | .           | .      |
|          |           | Mean                             | 4.0500      | .09238 |
|          |           | 95% Confidence Interval for Mean | Lower Bound | 3.6525 |
|          |           |                                  | Upper Bound | 4.4475 |
|          |           | 5% Trimmed Mean                  | .           |        |
|          |           | Median                           | 4.0500      |        |
|          |           | Variance                         | .026        |        |
|          |           | Std. Deviation                   | .16000      |        |
|          |           | Minimum                          | 3.89        |        |
|          |           | Maximum                          | 4.21        |        |
|          |           | Range                            | .32         |        |
|          |           | Interquartile Range              | .           |        |

|          |           |                                  |             |        |        |
|----------|-----------|----------------------------------|-------------|--------|--------|
| TBA_DAY0 | CONTROL   | Skewness                         |             | .000   | 1.225  |
|          |           | Kurtosis                         |             | .      | .      |
|          |           | Mean                             |             | .4608  | .00831 |
|          |           | 95% Confidence Interval for Mean | Lower Bound | .4250  |        |
|          |           |                                  | Upper Bound | .4966  |        |
|          |           | 5% Trimmed Mean                  |             | .      |        |
|          |           | Median                           |             | .4608  |        |
|          |           | Variance                         |             | .000   |        |
|          |           | Std. Deviation                   |             | .01440 |        |
|          |           | Minimum                          |             | .45    |        |
|          |           | Maximum                          |             | .48    |        |
|          |           | Range                            |             | .03    |        |
|          |           | Interquartile Range              |             | .      |        |
|          |           | Skewness                         |             | .000   | 1.225  |
|          |           | Kurtosis                         |             | .      | .      |
|          | PLA       | Mean                             |             | .4608  | .00831 |
|          |           | 95% Confidence Interval for Mean | Lower Bound | .4250  |        |
|          |           |                                  | Upper Bound | .4966  |        |
|          |           | 5% Trimmed Mean                  |             | .      |        |
|          |           | Median                           |             | .4608  |        |
|          |           | Variance                         |             | .000   |        |
|          |           | Std. Deviation                   |             | .01440 |        |
|          |           | Minimum                          |             | .45    |        |
|          |           | Maximum                          |             | .48    |        |
|          |           | Range                            |             | .03    |        |
|          |           | Interquartile Range              |             | .      |        |
|          |           | Skewness                         |             | .000   | 1.225  |
|          |           | Kurtosis                         |             | .      | .      |
|          | PLATEC0.6 | Mean                             |             | .4608  | .00831 |
|          |           | 95% Confidence Interval for Mean | Lower Bound | .4250  |        |
|          |           |                                  | Upper Bound | .4966  |        |
|          |           | 5% Trimmed Mean                  |             | .      |        |
|          |           | Median                           |             | .4608  |        |
|          |           | Variance                         |             | .000   |        |
|          |           | Std. Deviation                   |             | .01440 |        |
|          |           | Minimum                          |             | .45    |        |
|          |           | Maximum                          |             | .48    |        |
|          |           | Range                            |             | .03    |        |
|          |           | Interquartile Range              |             | .      |        |
|          |           | Skewness                         |             | .000   | 1.225  |
|          |           | Kurtosis                         |             | .      | .      |
| TBA_DAY2 | CONTROL   | Mean                             |             | .5868  | .01157 |
|          |           | 95% Confidence Interval for Mean | Lower Bound | .5370  |        |
|          |           |                                  | Upper Bound | .6366  |        |
|          |           | 5% Trimmed Mean                  |             | .      |        |
|          |           | Median                           |             | .5832  |        |
|          |           | Variance                         |             | .000   |        |
|          |           | Std. Deviation                   |             | .02004 |        |
|          |           | Minimum                          |             | .57    |        |
|          |           | Maximum                          |             | .61    |        |
|          |           | Range                            |             | .04    |        |
|          |           | Interquartile Range              |             | .      |        |
|          |           | Skewness                         |             | .782   | 1.225  |
|          |           | Kurtosis                         |             | .      | .      |
|          | PLA       | Mean                             |             | .5760  | .00749 |
|          |           | 95% Confidence Interval for Mean | Lower Bound | .5438  |        |
|          |           |                                  | Upper Bound | .6082  |        |
|          |           | 5% Trimmed Mean                  |             | .      |        |
|          |           | Median                           |             | .5724  |        |
|          |           | Variance                         |             | .000   |        |
|          |           | Std. Deviation                   |             | .01298 |        |
|          |           | Minimum                          |             | .57    |        |
|          |           | Maximum                          |             | .59    |        |
|          |           | Range                            |             | .03    |        |
|          |           | Interquartile Range              |             | .      |        |
|          |           | Skewness                         |             | 1.152  | 1.225  |
|          |           | Kurtosis                         |             | .      | .      |
|          | PLATEC0.6 | Mean                             |             | .5472  | .00624 |
|          |           | 95% Confidence Interval for Mean | Lower Bound | .5204  |        |
|          |           |                                  | Upper Bound | .5740  |        |
|          |           | 5% Trimmed Mean                  |             | .      |        |



|          |           |                                  |             |        |        |
|----------|-----------|----------------------------------|-------------|--------|--------|
| TBA_DAY4 | CONTROL   | Median                           |             | .5472  |        |
|          |           | Variance                         |             | .000   |        |
|          |           | Std. Deviation                   |             | .01080 |        |
|          |           | Minimum                          |             | .54    |        |
|          |           | Maximum                          |             | .56    |        |
|          |           | Range                            |             | .02    |        |
|          |           | Interquartile Range              |             | .      |        |
|          |           | Skewness                         |             | .000   | 1.225  |
|          |           | Kurtosis                         |             | .      | .      |
|          |           | Mean                             |             | .7524  | .01247 |
|          |           | 95% Confidence Interval for Mean | Lower Bound | .6987  |        |
|          |           |                                  | Upper Bound | .8061  |        |
|          |           | 5% Trimmed Mean                  |             | .      |        |
|          |           | Median                           |             | .7524  |        |
|          |           | Variance                         |             | .000   |        |
|          |           | Std. Deviation                   |             | .02160 |        |
|          |           | Minimum                          |             | .73    |        |
|          |           | Maximum                          |             | .77    |        |
|          |           | Range                            |             | .04    |        |
|          |           | Interquartile Range              |             | .      |        |
|          |           | Skewness                         |             | .000   | 1.225  |
|          |           | Kurtosis                         |             | .      | .      |
| TBA_DAY4 | PLA       | Mean                             |             | .7116  | .00937 |
|          |           | 95% Confidence Interval for Mean | Lower Bound | .6713  |        |
|          |           |                                  | Upper Bound | .7519  |        |
|          |           | 5% Trimmed Mean                  |             | .      |        |
|          |           | Median                           |             | .7128  |        |
|          |           | Variance                         |             | .000   |        |
|          |           | Std. Deviation                   |             | .01623 |        |
|          |           | Minimum                          |             | .69    |        |
|          |           | Maximum                          |             | .73    |        |
|          |           | Range                            |             | .03    |        |
|          |           | Interquartile Range              |             | .      |        |
|          |           | Skewness                         |             | -.331  | 1.225  |
|          |           | Kurtosis                         |             | .      | .      |
|          | PLATEC0.6 | Mean                             |             | .6564  | .00865 |
|          |           | 95% Confidence Interval for Mean | Lower Bound | .6192  |        |
|          |           |                                  | Upper Bound | .6936  |        |
|          |           | 5% Trimmed Mean                  |             | .      |        |
|          |           | Median                           |             | .6516  |        |
|          |           | Variance                         |             | .000   |        |
|          |           | Std. Deviation                   |             | .01499 |        |
|          |           | Minimum                          |             | .64    |        |
|          |           | Maximum                          |             | .67    |        |
|          |           | Range                            |             | .03    |        |
|          |           | Interquartile Range              |             | .      |        |
|          |           | Skewness                         |             | 1.293  | 1.225  |
|          |           | Kurtosis                         |             | .      | .      |
| TBA_DAY6 | CONTROL   | Mean                             |             | .8124  | .01182 |
|          |           | 95% Confidence Interval for Mean | Lower Bound | .7615  |        |
|          |           |                                  | Upper Bound | .8633  |        |
|          |           | 5% Trimmed Mean                  |             | .      |        |
|          |           | Median                           |             | .8064  |        |
|          |           | Variance                         |             | .000   |        |
|          |           | Std. Deviation                   |             | .02047 |        |
|          |           | Minimum                          |             | .80    |        |
|          |           | Maximum                          |             | .84    |        |
|          |           | Range                            |             | .04    |        |
|          |           | Interquartile Range              |             | .      |        |
|          |           | Skewness                         |             | 1.206  | 1.225  |
|          |           | Kurtosis                         |             | .      | .      |
|          | PLA       | Mean                             |             | .8016  | .00840 |
|          |           | 95% Confidence Interval for Mean | Lower Bound | .7655  |        |
|          |           |                                  | Upper Bound | .8377  |        |
|          |           | 5% Trimmed Mean                  |             | .      |        |
|          |           | Median                           |             | .7992  |        |
|          |           | Variance                         |             | .000   |        |
|          |           | Std. Deviation                   |             | .01455 |        |
|          |           | Minimum                          |             | .79    |        |
|          |           | Maximum                          |             | .82    |        |
|          |           | Range                            |             | .03    |        |

|           |                                  |             |        |        |
|-----------|----------------------------------|-------------|--------|--------|
| PLATEC0.6 | Interquartile Range              |             | .      |        |
|           | Skewness                         |             | .722   | 1.225  |
|           | Kurtosis                         |             | .      | .      |
|           | Mean                             |             | .7560  | .00550 |
|           | 95% Confidence Interval for Mean | Lower Bound | .7323  |        |
|           |                                  | Upper Bound | .7797  |        |
|           | 5% Trimmed Mean                  |             | .      |        |
|           | Median                           |             | .7524  |        |
|           | Variance                         |             | .000   |        |
|           | Std. Deviation                   |             | .00952 |        |
|           | Minimum                          |             | .75    |        |
|           | Maximum                          |             | .77    |        |
|           | Range                            |             | .02    |        |
|           | Interquartile Range              |             | .      |        |
|           | Skewness                         |             | 1.458  | 1.225  |
|           | Kurtosis                         |             | .      | .      |

- a. There are no valid cases for cohesionDAY0 when Film\_group3 = .. Statistics cannot be computed for this level.  
b. There are no valid cases for cohesionDAY2 when Film\_group3 = .. Statistics cannot be computed for this level.  
c. There are no valid cases for cohesionDAY4 when Film\_group3 = .. Statistics cannot be computed for this level.  
d. There are no valid cases for cohesionDAY6 when Film\_group3 = .. Statistics cannot be computed for this level.  
e. There are no valid cases for colorDAY0 when Film\_group3 = .. Statistics cannot be computed for this level.  
f. There are no valid cases for colorDAY2 when Film\_group3 = .. Statistics cannot be computed for this level.  
g. There are no valid cases for colorDAY4 when Film\_group3 = .. Statistics cannot be computed for this level.  
h. There are no valid cases for colorDAY6 when Film\_group3 = .. Statistics cannot be computed for this level.  
i. There are no valid cases for feDAY0 when Film\_group3 = .. Statistics cannot be computed for this level.  
j. There are no valid cases for feDAY2 when Film\_group3 = .. Statistics cannot be computed for this level.  
k. There are no valid cases for feDAY4 when Film\_group3 = .. Statistics cannot be computed for this level.  
l. There are no valid cases for feDAY6 when Film\_group3 = .. Statistics cannot be computed for this level.  
m. There are no valid cases for odorDAY0 when Film\_group3 = .. Statistics cannot be computed for this level.  
n. There are no valid cases for odorDAY2 when Film\_group3 = .. Statistics cannot be computed for this level.  
o. There are no valid cases for odorDAY4 when Film\_group3 = .. Statistics cannot be computed for this level.  
p. There are no valid cases for odorDAY6 when Film\_group3 = .. Statistics cannot be computed for this level.  
q. There are no valid cases for TBA\_DAY0 when Film\_group3 = .. Statistics cannot be computed for this level.  
r. There are no valid cases for TBA\_DAY2 when Film\_group3 = .. Statistics cannot be computed for this level.  
s. There are no valid cases for TBA\_DAY4 when Film\_group3 = .. Statistics cannot be computed for this level.  
t. There are no valid cases for TBA\_DAY6 when Film\_group3 = .. Statistics cannot be computed for this level.

**Table S13:** Overall mean values significant difference hypothesis test using Median Test results for cohesion, color, heme-iron, odor, and TBARS parameters at DAY 0, DAY 2, DAY 4, and DAY 6.

#### Hypothesis Test Summary

|    | Null Hypothesis                                                            | Test                            | Sig. <sup>b,c</sup> | Decision                    |
|----|----------------------------------------------------------------------------|---------------------------------|---------------------|-----------------------------|
| 1  | The medians of cohesionDAY0 are the same across categories of Film_group3. | Independent-Samples Median Test | . <sup>a</sup>      | Unable to compute.          |
| 2  | The medians of cohesionDAY2 are the same across categories of Film_group3. | Independent-Samples Median Test | .638                | Retain the null hypothesis. |
| 3  | The medians of cohesionDAY4 are the same across categories of Film_group3. | Independent-Samples Median Test | .043                | Reject the null hypothesis. |
| 4  | The medians of cohesionDAY6 are the same across categories of Film_group3. | Independent-Samples Median Test | .043                | Reject the null hypothesis. |
| 5  | The medians of colorDAY0 are the same across categories of Film_group3.    | Independent-Samples Median Test | . <sup>a</sup>      | Unable to compute.          |
| 6  | The medians of colorDAY2 are the same across categories of Film_group3.    | Independent-Samples Median Test | .043                | Reject the null hypothesis. |
| 7  | The medians of colorDAY4 are the same across categories of Film_group3.    | Independent-Samples Median Test | .638                | Retain the null hypothesis. |
| 8  | The medians of colorDAY6 are the same across categories of Film_group3.    | Independent-Samples Median Test | .043                | Reject the null hypothesis. |
| 9  | The medians of feDAY0 are the same across categories of Film_group3.       | Independent-Samples Median Test | 1.000               | Retain the null hypothesis. |
| 10 | The medians of feDAY2 are the same across categories of Film_group3.       | Independent-Samples Median Test | .043                | Reject the null hypothesis. |
| 11 | The medians of feDAY4 are the same across categories of Film_group3.       | Independent-Samples Median Test | .043                | Reject the null hypothesis. |
| 12 | The medians of feDAY6 are the same across categories of Film_group3.       | Independent-Samples Median Test | .043                | Reject the null hypothesis. |
| 13 | The medians of odorDAY0 are the same across categories of Film_group3.     | Independent-Samples Median Test | . <sup>a</sup>      | Unable to compute.          |
| 14 | The medians of odorDAY2 are the same across categories of Film_group3.     | Independent-Samples Median Test | .043                | Reject the null hypothesis. |
| 15 | The medians of odorDAY4 are the same across categories of Film_group3.     | Independent-Samples Median Test | .043                | Reject the null hypothesis. |
| 16 | The medians of odorDAY6 are the same across categories of Film_group3.     | Independent-Samples Median Test | .043                | Reject the null hypothesis. |
| 17 | The medians of TBA_DAY0 are the same across categories of Film_group3.     | Independent-Samples Median Test | 1.000               | Retain the null hypothesis. |
| 18 | The medians of TBA_DAY2 are the same across categories of Film_group3.     | Independent-Samples Median Test | .165                | Retain the null hypothesis. |
| 19 | The medians of TBA_DAY4 are the same across categories of Film_group3.     | Independent-Samples Median Test | .043                | Reject the null hypothesis. |
| 20 | The medians of TBA_DAY6 are the same across categories of Film_group3.     | Independent-Samples Median Test | .165                | Retain the null hypothesis. |

a. All test field values are less than or equal to the median.

b. The significance level is .050.

c. Asymptotic significance is displayed.

**Table S14:** Pairwise mean values significant difference hypothesis test using Median Test results for TBARS parameter at DAY 0, DAY 2, DAY 4, and DAY 6.

#### Pairwise Comparisons of Film\_group3 DAY 0

| Sample 1-Sample 2 | Test Statistic | Sig.  | Adj. Sig. <sup>a</sup> |
|-------------------|----------------|-------|------------------------|
| CONTROL-PLA       | .000           | 1.000 | 1.000                  |
| CONTROL-PLATEC0.6 | .000           | 1.000 | 1.000                  |

|                                           |                |       |                        |
|-------------------------------------------|----------------|-------|------------------------|
| PLA-PLATEC0.6                             | .000           | 1.000 | 1.000                  |
| Pairwise Comparisons of Film_group3 DAY 2 |                |       |                        |
| Sample 1-Sample 2                         | Test Statistic | Sig.  | Adj. Sig. <sup>a</sup> |
| PLATEC0.6-PLA                             | 6.000          | .014  | .043                   |
| PLATEC0.6-CONTROL                         | 6.000          | .014  | .043                   |
| PLA-CONTROL                               | .667           | .414  | 1.000                  |
| Pairwise Comparisons of Film_group3 DAY 4 |                |       |                        |
| Sample 1-Sample 2                         | Test Statistic | Sig.  | Adj. Sig. <sup>a</sup> |
| PLATEC0.6-PLA                             | 6.000          | .014  | .043                   |
| PLATEC0.6-CONTROL                         | 6.000          | .014  | .043                   |
| PLA-CONTROL                               | 6.000          | .014  | .043                   |
| Pairwise Comparisons of Film_group3 DAY 6 |                |       |                        |
| Sample 1-Sample 2                         | Test Statistic | Sig.  | Adj. Sig. <sup>a</sup> |
| PLATEC0.6-PLA                             | 6.000          | .014  | .043                   |
| PLATEC0.6-CONTROL                         | 6.000          | .014  | .043                   |
| PLA-CONTROL                               | .667           | .414  | 1.000                  |

Each row tests the null hypothesis that the Sample 1 and Sample 2 distributions are the same.

Asymptotic significances (2-sided tests) are displayed. The significance level is .050.

a. Significance values have been adjusted by the Bonferroni correction for multiple tests.

**Table S15:** Pairwise mean values significant difference hypothesis test using Median Test results for Heme-Iron parameter at DAY 0, DAY 2, DAY 4, and DAY 6.

|                                           |                |       |                        |
|-------------------------------------------|----------------|-------|------------------------|
| Pairwise Comparisons of Film_group3 DAY 0 |                |       |                        |
| Sample 1-Sample 2                         | Test Statistic | Sig.  | Adj. Sig. <sup>a</sup> |
| CONTROL-PLA                               | .000           | 1.000 | 1.000                  |
| CONTROL-PLATEC0.6                         | .000           | 1.000 | 1.000                  |
| PLA-PLATEC0.6                             | .000           | 1.000 | 1.000                  |
| Pairwise Comparisons of Film_group3 DAY 2 |                |       |                        |
| Sample 1-Sample 2                         | Test Statistic | Sig.  | Adj. Sig. <sup>a</sup> |
| CONTROL-PLA                               | .667           | .414  | 1.000                  |
| CONTROL-PLATEC0.6                         | 6.000          | .014  | .043                   |
| PLA-PLATEC0.6                             | 6.000          | .014  | .043                   |
| Pairwise Comparisons of Film_group3 DAY 4 |                |       |                        |
| Sample 1-Sample 2                         | Test Statistic | Sig.  | Adj. Sig. <sup>a</sup> |
| CONTROL-PLA                               | .667           | .414  | 1.000                  |
| CONTROL-PLATEC0.6                         | 6.000          | .014  | .043                   |
| PLA-PLATEC0.6                             | 6.000          | .014  | .043                   |
| Pairwise Comparisons of Film_group3 DAY 6 |                |       |                        |
| Sample 1-Sample 2                         | Test Statistic | Sig.  | Adj. Sig. <sup>a</sup> |
| PLA-CONTROL                               | .667           | .414  | 1.000                  |
| PLA-PLATEC0.6                             | 6.000          | .014  | .043                   |
| CONTROL-PLATEC0.6                         | .667           | .414  | 1.000                  |

Each row tests the null hypothesis that the Sample 1 and Sample 2 distributions are the same.

Asymptotic significances (2-sided tests) are displayed. The significance level is .050.

a. Significance values have been adjusted by the Bonferroni correction for multiple tests.

**Table S16:** Correlations between thiobarbituric acid reactive substances (TBARS) and Heme iron content.

|      |                     | DAY0 | DAY2   | DAY4   | DAY6   |
|------|---------------------|------|--------|--------|--------|
| DAY0 | Pearson Correlation | 1    | .357   | .378   | .389   |
|      | Sig. (2-tailed)     |      | .146   | .122   | .111   |
|      | N                   | 18   | 18     | 18     | 18     |
| DAY2 | Pearson Correlation | .357 | 1      | .997** | .997** |
|      | Sig. (2-tailed)     | .146 |        | .000   | .000   |
|      | N                   | 18   | 18     | 18     | 18     |
| DAY4 | Pearson Correlation | .378 | .997** | 1      | .997** |
|      | Sig. (2-tailed)     | .122 | .000   |        | .000   |
|      | N                   | 18   | 18     | 18     | 18     |
| DAY6 | Pearson Correlation | .389 | .997** | .997** | 1      |
|      | Sig. (2-tailed)     | .111 | .000   | .000   |        |
|      | N                   | 18   | 18     | 18     | 18     |

\*\*. Correlation is significant at the 0.01 level (2-tailed).

**Table S17:** Description statistics of TVC from DAY 0 to DAY 6

**Descriptives<sup>a,b,c,d</sup>**

|          | Film_group3 |                                  | Statistic   | Std. Error |
|----------|-------------|----------------------------------|-------------|------------|
| TVC_DAY0 | CONTROL     | Mean                             | 4.3800      | .01732     |
|          |             | 95% Confidence Interval for Mean | Lower Bound | 4.3055     |
|          |             |                                  | Upper Bound | 4.4545     |
|          |             | 5% Trimmed Mean                  |             |            |

|                                  |             |                     |         |                                  |             |        |        |
|----------------------------------|-------------|---------------------|---------|----------------------------------|-------------|--------|--------|
|                                  |             | Median              |         | 4.3800                           |             |        |        |
|                                  |             | Variance            |         | .001                             |             |        |        |
|                                  |             | Std. Deviation      |         | .03000                           |             |        |        |
|                                  |             | Minimum             |         | 4.35                             |             |        |        |
|                                  |             | Maximum             |         | 4.41                             |             |        |        |
|                                  |             | Range               |         | .06                              |             |        |        |
|                                  |             | Interquartile Range |         | .                                |             |        |        |
|                                  |             | Skewness            |         | .000                             | 1.225       |        |        |
|                                  |             | Kurtosis            |         | .                                | .           |        |        |
|                                  |             | PLA                 |         | Mean                             |             | 4.3800 | .01732 |
| 95% Confidence Interval for Mean | Lower Bound |                     |         | 4.3055                           |             |        |        |
|                                  | Upper Bound |                     |         | 4.4545                           |             |        |        |
| 5% Trimmed Mean                  |             |                     |         | .                                |             |        |        |
| Median                           |             |                     |         | 4.3800                           |             |        |        |
| Variance                         |             |                     |         | .001                             |             |        |        |
| Std. Deviation                   |             |                     |         | .03000                           |             |        |        |
| Minimum                          |             |                     |         | 4.35                             |             |        |        |
| Maximum                          |             |                     |         | 4.41                             |             |        |        |
| Range                            |             |                     |         | .06                              |             |        |        |
|                                  |             | Interquartile Range |         | .                                |             |        |        |
|                                  |             | Skewness            |         | .000                             | 1.225       |        |        |
|                                  |             | Kurtosis            |         | .                                | .           |        |        |
|                                  |             | PLATEC0.6           |         | Mean                             |             | 4.3800 | .01732 |
|                                  |             |                     |         | 95% Confidence Interval for Mean | Lower Bound | 4.3055 |        |
|                                  |             |                     |         |                                  | Upper Bound | 4.4545 |        |
|                                  |             |                     |         | 5% Trimmed Mean                  |             | .      |        |
|                                  |             |                     |         | Median                           |             | 4.3800 |        |
|                                  |             |                     |         | Variance                         |             | .001   |        |
|                                  |             |                     |         | Std. Deviation                   |             | .03000 |        |
| Minimum                          |             |                     |         | 4.35                             |             |        |        |
| Maximum                          |             |                     |         | 4.41                             |             |        |        |
| Range                            |             |                     |         | .06                              |             |        |        |
|                                  |             | Interquartile Range |         | .                                |             |        |        |
|                                  |             | Skewness            |         | .000                             | 1.225       |        |        |
|                                  |             | Kurtosis            |         | .                                | .           |        |        |
|                                  |             | TVC_DAY2            | CONTROL | Mean                             |             | 5.5567 | .07796 |
|                                  |             |                     |         | 95% Confidence Interval for Mean | Lower Bound | 5.2212 |        |
|                                  |             |                     |         |                                  | Upper Bound | 5.8921 |        |
|                                  |             |                     |         | 5% Trimmed Mean                  |             | .      |        |
|                                  |             |                     |         | Median                           |             | 5.5600 |        |
|                                  |             |                     |         | Variance                         |             | .018   |        |
|                                  |             |                     |         | Std. Deviation                   |             | .13503 |        |
| Minimum                          |             |                     |         | 5.42                             |             |        |        |
| Maximum                          |             |                     |         | 5.69                             |             |        |        |
| Range                            |             |                     |         | .27                              |             |        |        |
|                                  |             | Interquartile Range |         | .                                |             |        |        |
|                                  |             | Skewness            |         | -.111                            | 1.225       |        |        |
|                                  |             | Kurtosis            |         | .                                | .           |        |        |
|                                  |             | PLA                 |         | Mean                             |             | 5.2667 | .09528 |
|                                  |             |                     |         | 95% Confidence Interval for Mean | Lower Bound | 4.8567 |        |
|                                  |             |                     |         |                                  | Upper Bound | 5.6766 |        |
|                                  |             |                     |         | 5% Trimmed Mean                  |             | .      |        |
|                                  |             |                     |         | Median                           |             | 5.2700 |        |
|                                  |             |                     |         | Variance                         |             | .027   |        |
|                                  |             |                     |         | Std. Deviation                   |             | .16503 |        |
| Minimum                          |             |                     |         | 5.10                             |             |        |        |
| Maximum                          |             |                     |         | 5.43                             |             |        |        |
| Range                            |             |                     |         | .33                              |             |        |        |
|                                  |             | Interquartile Range |         | .                                |             |        |        |
|                                  |             | Skewness            |         | -.091                            | 1.225       |        |        |
|                                  |             | Kurtosis            |         | .                                | .           |        |        |
|                                  |             | PLATEC0.6           |         | Mean                             |             | 5.0800 | .02309 |
|                                  |             |                     |         | 95% Confidence Interval for Mean | Lower Bound | 4.9806 |        |
|                                  |             |                     |         |                                  | Upper Bound | 5.1794 |        |
|                                  |             |                     |         | 5% Trimmed Mean                  |             | .      |        |
|                                  |             |                     |         | Median                           |             | 5.0800 |        |
|                                  |             |                     |         | Variance                         |             | .002   |        |
|                                  |             |                     |         | Std. Deviation                   |             | .04000 |        |
| Minimum                          |             |                     |         | 5.04                             |             |        |        |
| Maximum                          |             |                     |         | 5.12                             |             |        |        |
| Range                            |             |                     |         | .08                              |             |        |        |

|          |           |                                  |             |        |        |
|----------|-----------|----------------------------------|-------------|--------|--------|
| TVC_DAY4 | CONTROL   | Interquartile Range              |             | .      |        |
|          |           | Skewness                         |             | .000   | 1.225  |
|          |           | Kurtosis                         |             | .      | .      |
|          |           | Mean                             |             | 6.8367 | .03756 |
|          |           | 95% Confidence Interval for Mean | Lower Bound | 6.6750 |        |
|          |           |                                  | Upper Bound | 6.9983 |        |
|          |           | 5% Trimmed Mean                  |             | .      |        |
|          |           | Median                           |             | 6.8400 |        |
|          |           | Variance                         |             | .004   |        |
|          |           | Std. Deviation                   |             | .06506 |        |
|          |           | Minimum                          |             | 6.77   |        |
|          |           | Maximum                          |             | 6.90   |        |
|          |           | Range                            |             | .13    |        |
|          |           | Interquartile Range              |             | .      |        |
|          |           | Skewness                         |             | -.230  | 1.225  |
|          |           | Kurtosis                         |             | .      | .      |
|          | PLA       | Mean                             |             | 6.4767 | .03756 |
|          |           | 95% Confidence Interval for Mean | Lower Bound | 6.3150 |        |
|          |           |                                  | Upper Bound | 6.6383 |        |
|          |           | 5% Trimmed Mean                  |             | .      |        |
|          |           | Median                           |             | 6.4800 |        |
|          |           | Variance                         |             | .004   |        |
|          |           | Std. Deviation                   |             | .06506 |        |
|          |           | Minimum                          |             | 6.41   |        |
|          |           | Maximum                          |             | 6.54   |        |
|          |           | Range                            |             | .13    |        |
|          |           | Interquartile Range              |             | .      |        |
|          |           | Skewness                         |             | -.230  | 1.225  |
|          |           | Kurtosis                         |             | .      | .      |
|          | PLATEC0.6 | Mean                             |             | 6.3100 | .04041 |
|          |           | 95% Confidence Interval for Mean | Lower Bound | 6.1361 |        |
|          |           |                                  | Upper Bound | 6.4839 |        |
|          |           | 5% Trimmed Mean                  |             | .      |        |
|          |           | Median                           |             | 6.3100 |        |
|          |           | Variance                         |             | .005   |        |
|          |           | Std. Deviation                   |             | .07000 |        |
|          |           | Minimum                          |             | 6.24   |        |
|          |           | Maximum                          |             | 6.38   |        |
|          |           | Range                            |             | .14    |        |
|          |           | Interquartile Range              |             | .      |        |
|          |           | Skewness                         |             | .000   | 1.225  |
|          |           | Kurtosis                         |             | .      | .      |
| TVC_DAY6 | CONTROL   | Mean                             |             | 8.0400 | .00577 |
|          |           | 95% Confidence Interval for Mean | Lower Bound | 8.0152 |        |
|          |           |                                  | Upper Bound | 8.0648 |        |
|          |           | 5% Trimmed Mean                  |             | .      |        |
|          |           | Median                           |             | 8.0400 |        |
|          |           | Variance                         |             | .000   |        |
|          |           | Std. Deviation                   |             | .01000 |        |
|          |           | Minimum                          |             | 8.03   |        |
|          |           | Maximum                          |             | 8.05   |        |
|          |           | Range                            |             | .02    |        |
|          |           | Interquartile Range              |             | .      |        |
|          |           | Skewness                         |             | .000   | 1.225  |
|          |           | Kurtosis                         |             | .      | .      |
|          | PLA       | Mean                             |             | 7.5067 | .02028 |
|          |           | 95% Confidence Interval for Mean | Lower Bound | 7.4194 |        |
|          |           |                                  | Upper Bound | 7.5939 |        |
|          |           | 5% Trimmed Mean                  |             | .      |        |
|          |           | Median                           |             | 7.5100 |        |
|          |           | Variance                         |             | .001   |        |
|          |           | Std. Deviation                   |             | .03512 |        |
|          |           | Minimum                          |             | 7.47   |        |
|          |           | Maximum                          |             | 7.54   |        |
|          |           | Range                            |             | .07    |        |
|          |           | Interquartile Range              |             | .      |        |
|          |           | Skewness                         |             | -.423  | 1.225  |
|          |           | Kurtosis                         |             | .      | .      |
|          | PLATEC0.6 | Mean                             |             | 7.3567 | .02603 |
|          |           | 95% Confidence Interval for Mean | Lower Bound | 7.2447 |        |
|          |           |                                  | Upper Bound | 7.4687 |        |

|  |                     |        |       |
|--|---------------------|--------|-------|
|  | 5% Trimmed Mean     | .      |       |
|  | Median              | 7.3600 |       |
|  | Variance            | .002   |       |
|  | Std. Deviation      | .04509 |       |
|  | Minimum             | 7.31   |       |
|  | Maximum             | 7.40   |       |
|  | Range               | .09    |       |
|  | Interquartile Range | .      |       |
|  | Skewness            | -.331  | 1.225 |
|  | Kurtosis            | .      |       |

- a. There are no valid cases for TVC\_DAY0 when Film\_group3 = .. Statistics cannot be computed for this level.  
b. There are no valid cases for TVC\_DAY2 when Film\_group3 = .. Statistics cannot be computed for this level.  
c. There are no valid cases for TVC\_DAY4 when Film\_group3 = .. Statistics cannot be computed for this level.  
d. There are no valid cases for TVC\_DAY6 when Film\_group3 = .. Statistics cannot be computed for this level.

**Table S18:** Overall mean values significant difference hypothesis test using Median Test results for TVC parameter at DAY 0, DAY 2, DAY 4, and DAY 6.

#### Hypothesis Test Summary

|   | Null Hypothesis                                                        | Test                            | Sig. <sup>a,b</sup> | Decision                    |
|---|------------------------------------------------------------------------|---------------------------------|---------------------|-----------------------------|
| 1 | The medians of TVC_DAY0 are the same across categories of Film_group3. | Independent-Samples Median Test | 1.000               | Retain the null hypothesis. |
| 2 | The medians of TVC_DAY2 are the same across categories of Film_group3. | Independent-Samples Median Test | .043                | Reject the null hypothesis. |
| 3 | The medians of TVC_DAY4 are the same across categories of Film_group3. | Independent-Samples Median Test | .043                | Reject the null hypothesis. |
| 4 | The medians of TVC_DAY6 are the same across categories of Film_group3. | Independent-Samples Median Test | .043                | Reject the null hypothesis. |

- a. The significance level is .050.  
b. Asymptotic significance is displayed.

**Table S19:** Pairwise mean values significant difference hypothesis test using Median Test results for TVC parameter at DAY 0, DAY 2, DAY 4, and DAY 6.

#### Pairwise Comparisons of Film\_group3 DAY 0

| Sample 1-Sample 2 | Test Statistic | Sig.  | Adj. Sig. <sup>a</sup> |
|-------------------|----------------|-------|------------------------|
| CONTROL-PLA       | .000           | 1.000 | 1.000                  |
| CONTROL-PLATEC0.6 | .000           | 1.000 | 1.000                  |
| PLA-PLATEC0.6     | .000           | 1.000 | 1.000                  |

#### Pairwise Comparisons of Film\_group3 DAY 2

| Sample 1-Sample 2 | Test Statistic | Sig. | Adj. Sig. <sup>a</sup> |
|-------------------|----------------|------|------------------------|
| PLATEC0.6-PLA     | .667           | .414 | 1.000                  |
| PLATEC0.6-CONTROL | 6.000          | .014 | .043                   |
| PLA-CONTROL       | .667           | .414 | 1.000                  |

#### Pairwise Comparisons of Film\_group3 DAY 4

| Sample 1-Sample 2 | Test Statistic | Sig. | Adj. Sig. <sup>a</sup> |
|-------------------|----------------|------|------------------------|
| PLATEC0.6-PLA     | 6.000          | .014 | .043                   |
| PLATEC0.6-CONTROL | 6.000          | .014 | .043                   |
| PLA-CONTROL       | 6.000          | .014 | .043                   |

#### Pairwise Comparisons of Film\_group3 DAY 6

| Sample 1-Sample 2 | Test Statistic | Sig. | Adj. Sig. <sup>a</sup> |
|-------------------|----------------|------|------------------------|
| PLATEC0.6-PLA     | 6.000          | .014 | .043                   |
| PLATEC0.6-CONTROL | 6.000          | .014 | .043                   |
| PLA-CONTROL       | 6.000          | .014 | .043                   |

Each row tests the null hypothesis that the Sample 1 and Sample 2 distributions are the same. Asymptotic significances (2-sided tests) are displayed. The significance level is .050.

- a. Significance values have been adjusted by the Bonferroni correction for multiple tests.

**Table S20:** Pairwise mean values significant difference hypothesis test using Median Test results for COHESION parameter at DAY 2, DAY 4, and DAY 6.

#### Pairwise Comparisons of Film\_group3 DAY 2

| Sample 1-Sample 2 | Test Statistic | Sig. | Adj. Sig. <sup>a</sup> |
|-------------------|----------------|------|------------------------|
| PLA-PLATEC0.6     | .667           | .414 | 1.000                  |
| PLA-CONTROL       | .667           | .414 | 1.000                  |
| PLATEC0.6-CONTROL | .667           | .414 | 1.000                  |

#### Pairwise Comparisons of Film\_group3 DAY 4

| Sample 1-Sample 2 | Test Statistic | Sig. | Adj. Sig. <sup>a</sup> |
|-------------------|----------------|------|------------------------|
| CONTROL-PLA       | .667           | .414 | 1.000                  |
| CONTROL-PLATEC0.6 | 6.000          | .014 | .043                   |
| PLA-PLATEC0.6     | .667           | .414 | 1.000                  |

#### Pairwise Comparisons of Film\_group3 DAY 6

| Sample 1-Sample 2 | Test Statistic | Sig. | Adj. Sig. <sup>a</sup> |
|-------------------|----------------|------|------------------------|
| CONTROL-PLA       | 6.000          | .014 | .043                   |
| CONTROL-PLATEC0.6 | 6.000          | .014 | .043                   |
| PLA-PLATEC0.6     | 6.000          | .014 | .043                   |

Each row tests the null hypothesis that the Sample 1 and Sample 2 distributions are the same.  
Asymptotic significances (2-sided tests) are displayed. The significance level is .050.  
a. Significance values have been adjusted by the Bonferroni correction for multiple tests.

**Table S21:** Pairwise mean values significant difference hypothesis test using Median Test results for COLOR parameter at DAY 2, DAY 4, and DAY 6.

| Pairwise Comparisons of Film_group3 DAY 2 |                |      |                        |
|-------------------------------------------|----------------|------|------------------------|
| Sample 1-Sample 2                         | Test Statistic | Sig. | Adj. Sig. <sup>a</sup> |
| CONTROL-PLA                               | .667           | .414 | 1.000                  |
| CONTROL-PLATEC0.6                         | 6.000          | .014 | .043                   |
| PLA-PLATEC0.6                             | .667           | .414 | 1.000                  |
| Pairwise Comparisons of Film_group3 DAY 4 |                |      |                        |
| Sample 1-Sample 2                         | Test Statistic | Sig. | Adj. Sig. <sup>a</sup> |
| CONTROL-PLA                               | .667           | .414 | 1.000                  |
| CONTROL-PLATEC0.6                         | .667           | .414 | 1.000                  |
| PLA-PLATEC0.6                             | .667           | .414 | 1.000                  |
| Pairwise Comparisons of Film_group3 DAY 6 |                |      |                        |
| Sample 1-Sample 2                         | Test Statistic | Sig. | Adj. Sig. <sup>a</sup> |
| CONTROL-PLA                               | 6.000          | .014 | .043                   |
| CONTROL-PLATEC0.6                         | 6.000          | .014 | .043                   |
| PLA-PLATEC0.6                             | 6.000          | .014 | .043                   |

Each row tests the null hypothesis that the Sample 1 and Sample 2 distributions are the same.  
Asymptotic significances (2-sided tests) are displayed. The significance level is .050.  
a. Significance values have been adjusted by the Bonferroni correction for multiple tests.

**Table S22:** Pairwise mean values significant difference hypothesis test using Median Test results for ODOR parameter at DAY 2, DAY 4, and DAY 6.

| Pairwise Comparisons of Film_group3 DAY 2 |                |      |                        |
|-------------------------------------------|----------------|------|------------------------|
| Sample 1-Sample 2                         | Test Statistic | Sig. | Adj. Sig. <sup>a</sup> |
| CONTROL-PLA                               | .667           | .414 | 1.000                  |
| CONTROL-PLATEC0.6                         | 6.000          | .014 | .043                   |
| PLA-PLATEC0.6                             | .667           | .414 | 1.000                  |
| Pairwise Comparisons of Film_group3 DAY 4 |                |      |                        |
| Sample 1-Sample 2                         | Test Statistic | Sig. | Adj. Sig. <sup>a</sup> |
| CONTROL-PLA                               | .667           | .414 | 1.000                  |
| CONTROL-PLATEC0.6                         | 6.000          | .014 | .043                   |
| PLA-PLATEC0.6                             | .667           | .414 | 1.000                  |
| Pairwise Comparisons of Film_group3 DAY 6 |                |      |                        |
| Sample 1-Sample 2                         | Test Statistic | Sig. | Adj. Sig. <sup>a</sup> |
| CONTROL-PLA                               | .667           | .414 | 1.000                  |
| CONTROL-PLATEC0.6                         | 6.000          | .014 | .043                   |
| PLA-PLATEC0.6                             | 6.000          | .014 | .043                   |

Each row tests the null hypothesis that the Sample 1 and Sample 2 distributions are the same.  
Asymptotic significances (2-sided tests) are displayed. The significance level is .050.  
a. Significance values have been adjusted by the Bonferroni correction for multiple tests.
